# Supplementary material for: Effect of PCSK9 Inhibitors on Clinical Outcomes in Patients With Hypercholesterolemia: A Meta‐Analysis of 35 Randomized Controlled Trials
Source: PubMed Central journal article supplement — J Am Heart Assoc. 2017 Dec 9;6(12):e006910. doi: 10.1161/JAHA.117.006910 (PMC5779013; doi:10.1161/jaha.117.006910), 2017-12-09
Supplement: JAH3-6-e006910-s001.pdf [file JAH3-6-e006910-s001.pdf]

# **Supplemental Material**

**Table S1.** Study Characteristics

| <b>Study</b>                        | <b>Year</b> | <b>Phase</b> | <b>Treatment duration, weeks</b> | <b>Investigational drug and dose</b>    | <b>Control</b>        | <b>Population</b>      | <b>Statin</b> | <b>clinicaltrials.gov ID</b> |
|-------------------------------------|-------------|--------------|----------------------------------|-----------------------------------------|-----------------------|------------------------|---------------|------------------------------|
| <b>DESCARTES</b> <sup>1</sup>       | 2014        | 3            | 48                               | Evolocumab 420 mg Q4W                   | Placebo               | HC                     | Both          | NCT01516879                  |
| <b>FOURIER</b> <sup>2</sup>         | 2017        | 3            | 113                              | Evolocumab 420 mg Q4W/140 mg Q2W        | Placebo               | HC                     | Both          | NCT01764633                  |
| <b>GAUSS</b> <sup>3</sup>           | 2012        | 2            | 12                               | Evolocumab 420 mg Q4W ± Ezetimibe 10 mg | Ezetimibe             | HC - Statin intolerant | Non-intensive | NCT01375764                  |
| <b>GAUSS-2</b> <sup>4</sup>         | 2014        | 3            | 12                               | Evolocumab 420 mg/140 mg Q2W            | Ezetimibe             | HC - Statin intolerant | Non-intensive | NCT01763905                  |
| <b>GAUSS-3</b> <sup>5</sup>         | 2016        | 3            | 24                               | Evolocumab 420 mg Q4W                   | Ezetimibe             | HC - Statin intolerant | None          | NCT01984424                  |
| <b>GLAGOV</b> <sup>6</sup>          | 2016        | 3            | 76                               | Evolocumab 420 mg Q4W                   | Placebo               | HC - CAD               | Both          | NCT01813422                  |
| <b>LAPLACE-2</b> <sup>7</sup>       | 2014        | 3            | 12                               | Evolocumab 420 mg Q4W/140 mg Q2W        | Ezetimibe/<br>placebo | HC                     | Both          | NCT01763866                  |
| <b>LAPLACE-TIMI57</b> <sup>8</sup>  | 2012        | 2            | 12                               | Evolocumab 420 mg Q4W/140 mg Q2W        | Placebo               | HC                     | Both          | NCT01380730                  |
| <b>McKenney et al.</b> <sup>9</sup> | 2012        | 2            | 12                               | Alirocumab 150 mg Q2W/300 mg Q4W        | Placebo               | HC                     | Both          | NCT01288443                  |
| <b>MENDEL</b> <sup>10</sup>         | 2012        | 2            | 12                               | Evolocumab 420 mg Q4W/140 mg Q2W        | Ezetimibe/<br>placebo | HC                     | None          | NCT01375777                  |
| <b>MENDEL-2</b> <sup>11</sup>       | 2014        | 3            | 12                               | Evolocumab 420 mg Q4W/140 mg Q2W        | Ezetimibe/<br>placebo | HC                     | None          | NCT01763827                  |

| ODYSSEY                          |      |   |      |                                                                                    |           |                           |      |             |
|----------------------------------|------|---|------|------------------------------------------------------------------------------------|-----------|---------------------------|------|-------------|
| <b>ALTERNATIVE</b> <sup>12</sup> | 2015 | 3 | 24   | Alirocumab 75 mg Q2W<br>with potential up-titration to<br>150 mg Q2W               | Ezetimibe | HC - Statin<br>intolerant | None | NCT01709513 |
| <b>CHOICE I</b> <sup>13</sup>    | 2016 | 3 | 48   | Alirocumab 75 mg Q2W/<br>300 mg Q4W with potential<br>up-titration to 150 mg Q2W   | Placebo   | HC                        | Both | NCT01926782 |
| <b>CHOICE II</b> <sup>14</sup>   | 2016 | 3 | 24   | Alirocumab 75 mg<br>Q2W/150 mg Q4W with<br>potential up-titration to 150<br>mg Q2W | Placebo   | HC - Statin<br>intolerant | None | NCT02023879 |
| <b>COMBO I</b> <sup>15</sup>     | 2015 | 3 | 52   | Alirocumab 75mg Q2W,<br>increased to 150mg Q2W<br>prn                              | Placebo   | HC                        | Both | NCT01644175 |
| <b>COMBO II</b> <sup>16</sup>    | 2015 | 3 | 104* | Alirocumab 75mg Q2W<br>with potential up-titration to<br>150 mg Q2W                | Ezetimibe | HC                        | Both | NCT01644188 |
| <b>ESCAPE</b> <sup>17</sup>      | 2016 | 3 | 18   | Alirocumab 150mg Q2W                                                               | Placebo   | HeFH                      | Both | NCT02326220 |
| <b>FH I</b> <sup>18</sup>        | 2015 | 3 | 78   | Alirocumab 75mg Q2W<br>with potential up-titration to<br>150 mg Q2W                | Placebo   | HeFH                      | Both | NCT01623115 |
| <b>FH II</b> <sup>18</sup>       | 2015 | 3 | 78   | Alirocumab 75mg Q2W<br>with potential up-titration to<br>150 mg Q2W                | Placebo   | HeFH                      | Both | NCT01709500 |

|                                      |      |    |    |                                                                     |                                |      |      |                             |
|--------------------------------------|------|----|----|---------------------------------------------------------------------|--------------------------------|------|------|-----------------------------|
| <b>HIGH FH</b> <sup>19</sup>         | 2016 | 3  | 78 | Alirocumab 150mg Q2W                                                | Placebo                        | HeFH | Both | NCT01617655                 |
| <b>JAPAN</b> <sup>20</sup>           | 2016 | 3  | 52 | Alirocumab 75mg Q2W<br>with potential up-titration to<br>150 mg Q2W | Placebo                        | HC   | Both | NCT02107898                 |
| <b>LONG TERM</b> <sup>21</sup>       | 2015 | 3  | 78 | Alirocumab 150mg Q2W                                                | Placebo                        | HC   | Both | NCT01507831                 |
| <b>MONO</b> <sup>22</sup>            | 2014 | 3  | 24 | Alirocumab 75mg Q2W<br>with potential up-titration to<br>150 mg Q2W | Ezetimibe                      | HC   | None | NCT01644474                 |
| <b>OPTIONS I</b> <sup>23</sup>       | 2015 | 3  | 24 | Alirocumab 75mg Q2W<br>with potential up-titration to<br>150 mg Q2W | Ezetimibe/<br>double<br>statin | HC   | Both | NCT01730040                 |
| <b>OPTIONS II</b> <sup>24</sup>      | 2015 | 3  | 24 | Alirocumab 75mg Q2W<br>with potential up-titration to<br>150 mg Q2W | Ezetimibe/<br>double<br>statin | HC   | Both | NCT01730053                 |
| <b>OSLER 1 and 2</b> <sup>25</sup>   | 2015 | OL | 48 | Evolocumab 420 mg<br>Q4W/140 mg Q2W                                 | Standard<br>therapy            | HC   | Both | NCT01439880,<br>NCT01854918 |
| <b>Roth et al.</b> <sup>26</sup>     | 2012 | 2  | 8  | Alirocumab 150mg Q2W                                                | Placebo                        | HC   | Both | NCT01288469                 |
| <b>RUTHERFORD</b> <sup>27</sup>      | 2012 | 2  | 12 | Evolocumab 420 mg Q4W                                               | Placebo                        | HeFH | Both | NCT01375751                 |
| <b>RUTHERFORD 2</b> <sup>28</sup>    | 2015 | 3  | 12 | Evolocumab 420 mg<br>Q4W/140 mg Q2W                                 | Placebo                        | HeFH | Both | NCT01763918                 |
| <b>Stein et al.</b> <sup>29</sup>    | 2012 | 2  | 12 | Alirocumab 150 mg<br>Q2W/300 mg Q4W                                 | Placebo                        | HeFH | Both | NCT01266876                 |
| <b>Teramoto et al.</b> <sup>30</sup> | 2016 | 2  | 12 | Alirocumab 150 mg Q2W                                               | Placebo                        | HC   | Both | NCT01812707                 |
| <b>TESLA PART B</b> <sup>31</sup>    | 2015 | 3  | 12 | Evolocumab 420 mg Q4W                                               | Placebo                        | HoFH | Both | NCT01588496                 |

|                                |      |   |    |                                     |         |    |      |             |
|--------------------------------|------|---|----|-------------------------------------|---------|----|------|-------------|
| <b>YUKAWA</b> <sup>32</sup>    | 2014 | 2 | 12 | Evolocumab 420 mg<br>Q4W/140 mg Q2W | Placebo | HC | Both | NCT01652703 |
| <b>YUKAWA II</b> <sup>33</sup> | 2016 | 3 | 12 | Evolocumab 420 mg<br>Q4W/140 mg Q2W | Placebo | HC | Both | NCT01953328 |

CAD, coronary artery disease; HC, hypercholesterolemia; HeFH, heterozygous familial hypercholesterolemia; HoFH, homozygous familial hypercholesterolemia; Q2W, every four weeks; Q2W, every two weeks. \* Results reported up to week 52.

Expanded trial names: DESCARTES = Durable Effect of PCSK9 Antibody Compared with Placebo Study; FOURIER = Further Cardiovascular Outcomes Research With PCSK9 Inhibition in Subjects With Elevated Risk; GAUSS = Goal Achievement after Utilizing an anti-PCSK9 antibody in Statin Intolerant Subjects; GLAGOV = Global Assessment of Plaque Regression With a PCSK9 Antibody as Measured by Intravascular Ultrasound; LAPLACE-2 = LDL-C Assessment with PCSK9 Monoclonal Antibody Inhibition Combined With Statin Therapy-2; LAPLACE-TIMI 57 = LDL-C Assessment with PCSK9 Monoclonal Antibody Inhibition Combined With Statin Therapy = Thrombosis in Myocardial Infarction 57; MENDEL = Monoclonal Antibody Against PCSK9 to Reduce Elevated LDL-C in Patients Currently Not Receiving Drug Therapy For Easing Lipid Levels; OSLER = Open-Label Study of Long-term Evaluation Against LDL-C; RUTHERFORD = The Reduction of LDL-C With PCSK9 Inhibition in Heterozygous Familial Hypercholesterolemia Disorder; TESLA = Trial Evaluating PCSK9 Antibody in Subjects with LDL Receptor Abnormalities; YUKAWA = Study of LDL-Cholesterol Reduction Using a Monoclonal PCSK9 Antibody in Japanese Patients With Advanced Cardiovascular Risk.

**Table S2.** Baseline patient characteristics

| <b>Study</b>                        | <b>Participants<br/>, n</b> | <b>Age,<br/>years</b> | <b>Male, %</b> | <b>CAD, %</b> | <b>HTN, %</b> | <b>DM2, %</b> | <b>BMI,<br/>kg/m<sup>2</sup></b> | <b>LDL-C,<br/>mean</b> | <b>Statin, %</b> | <b>Intensive<br/>statin, %</b> |
|-------------------------------------|-----------------------------|-----------------------|----------------|---------------|---------------|---------------|----------------------------------|------------------------|------------------|--------------------------------|
| <b>DESCARTES</b> <sup>1</sup>       | 901                         | 55.4                  | 47.7%          | 15.1%         | 48.8%         | 12.2%         | 30.2                             | 100.3                  | 87.7%            | 45.2%                          |
| <b>FOURIER</b> <sup>2</sup>         | 27,654                      | 62.5                  | 75.4%          | NA            | 80.1%         | 36.6%         | NA                               | 93.7 <sup>†</sup>      | 100.0%           | 69.3%                          |
| <b>GAUSS</b> <sup>3</sup>           | 94                          | 61.5                  | 35.1%          | 20.2%         | 48.9%         | 11.7%         | 28.1                             | 192.3                  | 16.0%            | 0.0%                           |
| <b>GAUSS-2</b> <sup>4</sup>         | 307                         | 61.7                  | 54.0%          | 29.0%         | 59.0%         | 20.2%         | NA                               | 193.0                  | 17.9%            | 0.0%                           |
| <b>GAUSS-3</b> <sup>5</sup>         | 218                         | 58.8                  | 51.4%          | 31.7%         | 51.4%         | 11.9%         | 28.0                             | 219.8                  | 0.0%             | 0.0%                           |
| <b>GLAGOV</b> <sup>6</sup>          | 968                         | 59.8                  | 72.2%          | 100.0%        | 83.0%         | 20.9%         | 29.5                             | 92.5                   | 98.6%            | 58.9%                          |
| <b>LAPLACE-2</b> <sup>7</sup>       | 1896                        | 59.9                  | 54.2%          | 22.5%         | NA            | 15.5%         | NA                               | 109.1                  | 100.0%           | 40.8%                          |
| <b>LAPLACE-TIMI57</b> <sup>8</sup>  | 315                         | 62.6                  | 45.4%          | 32.1%         | 70.2%         | 16.5%         | 29.4                             | 121.8                  | 99.2%            | 29.3%                          |
| <b>McKenney et al.</b> <sup>9</sup> | 92                          | 56.2                  | 43.5%          | 5.4%          | 41.3%         | 14.1%         | 28.8                             | 128.6                  | 100.0%           | NA                             |
| <b>MENDEL</b> <sup>10</sup>         | 225                         | 51.2                  | 36.4%          | 0.0%          | 32.9%         | 0.0%          | 32.8                             | 142.3                  | 0.0%             | 0.0%                           |
| <b>MENDEL-2</b> <sup>11</sup>       | 614                         | 53.2                  | 31.1%          | 0.0%          | 28.7%         | 0.2%          | NA                               | 142.9                  | 0.0%             | 0.0%                           |
| <b>ODYSSEY</b>                      |                             |                       |                |               |               |               |                                  |                        |                  |                                |
| <b>ALTERNATIVE</b> <sup>12</sup>    | 251                         | 63.5                  | 54.6%          | 47.0%         | 64.6%         | 23.9%         | 29.0                             | 191.3                  | 0.0%             | 0.0%                           |
| <b>CHOICE I</b> <sup>13</sup>       | 803                         | 60.8                  | 57.5%          | 52.4%         | NA            | 27.0%         | 31.1                             | 122.1                  | 68.1%            | NA                             |

|                                    |      |      |       |       |       |       |      |        |        |       |
|------------------------------------|------|------|-------|-------|-------|-------|------|--------|--------|-------|
| <b>CHOICE II</b> <sup>14</sup>     | 233  | 63.1 | 55.8% | 49.8% | 60.9% | 16.3% | 28.9 | 157.9  | 0.0%   | 0.0%  |
| <b>COMBO I</b> <sup>15</sup>       | 316  | 63.0 | 65.8% | 78.2% | NA    | 43.1% | 32.3 | 102.2  | 99.7%  | 62.7% |
| <b>COMBO II</b> <sup>16</sup>      | 720  | 61.6 | 73.6% | 90.1% | NA    | 30.9% | 30.2 | 107.0  | 99.9%  | 66.7% |
| <b>ESCAPE</b> <sup>17</sup>        | 62   | 58.7 | 58.1% | NA    | NA    | NA    | 30.4 | 180.7  | 51.6%  | 40.3% |
| <b>FH I</b> <sup>18</sup>          | 486  | 52.0 | 56.4% | 46.3% | 43.2% | 11.7% | 29.3 | 144.6  | 100.0% | 83.5% |
| <b>FH II</b> <sup>18</sup>         | 249  | 53.2 | 52.6% | 35.7% | 32.5% | 4.0%  | 28.3 | 134.4  | 100.0% | 88.4% |
| <b>HIGH FH</b> <sup>19</sup>       | 107  | 50.6 | 53.3% | 49.5% | 57.0% | 14.0% | 28.9 | 197.8  | 100.0% | 72.9% |
| <b>JAPAN</b> <sup>20</sup>         | 216  | 60.8 | 60.6% | NA    | NA    | 68.5% | 25.5 | 141.2  | 100.0% | NA    |
| <b>LONG TERM</b> <sup>21</sup>     | 2341 | 60.5 | 62.2% | 68.6% | NA    | 34.6% | 30.3 | 122.4  | 99.9%  | 46.8% |
| <b>MONO</b> <sup>35</sup>          | 103  | 60.2 | 53.4% | NA    | NA    | 3.9%  | 29.3 | 139.7  | 0.0%   | 0.0%  |
| <b>OPTIONS I</b> <sup>23</sup>     | 355  | 62.9 | 65.1% | 56.3% | 78.3% | 49.9% | 31.0 | 105.1  | 100.0% | 68.5% |
| <b>OPTIONS II</b> <sup>24</sup>    | 305  | 60.9 | 61.3% | 58.0% | 72.5% | 41.3% | 31.3 | 111.3  | 100.0% | 68.2% |
| <b>OSLER 1 and 2</b> <sup>25</sup> | 4465 | 57.9 | 50.5% | 20.1% | 52.0% | 13.4% | NA   | 122.3† | 70.1%  | 27.1% |
| <b>Roth et al.</b> <sup>26</sup>   | 92   | 56.9 | 40.2% | 3.3%  | 51.1% | 15.2% | 29.4 | 122.6  | 100.0% | 66.3% |
| <b>RUTHERFORD</b> <sup>27</sup>    | 112  | 50.6 | 52.7% | 21.5% | NA    | NA    | NA   | 152.7  | 100.0% | 87.5% |
| <b>RUTHERFORD 2</b> <sup>28</sup>  | 329  | 51.2 | 57.8% | 31.3% | NA    | NA    | NA   | 156.0  | 100.0% | 87.0% |
| <b>Stein et al.</b> <sup>29</sup>  | 46   | 54.2 | 63.0% | 39.1% | NA    | 0.0%  | 29.5 | 146.1  | 100.0% | 78.3% |

|                                      |        |      |       |       |       |       |      |       |        |       |
|--------------------------------------|--------|------|-------|-------|-------|-------|------|-------|--------|-------|
| <b>Teramoto et al.</b> <sup>30</sup> | 75     | 57.7 | 52.0% | 0.0%  | 34.7% | 14.7% | 24.8 | 120.8 | 100.0% | NA    |
| <b>TESLA PART B</b> <sup>31</sup>    | 49     | 31.0 | 51.0% | 43.0% | NA    | NA    | NA   | 348.0 | 100.0% | 93.9% |
| <b>YUKAWA</b> <sup>32</sup>          | 207    | 60.8 | 67.6% | 27.1% | 72.9% | 35.3% | NA   | 140.2 | 100.0% | 23.7% |
| <b>YUKAWA II</b> <sup>33</sup>       | 404    | 61.5 | 60.4% | 12.9% | 73.5% | 48.8% | NA   | 106.0 | 100.0% | 50.7% |
| <b>Overall</b>                       | 45,520 | 61.0 | 67.6% | 39.2% | 73.1% | 30.6% | 30.0 | 106.0 | 91.8%  | 58.4% |

BMI, body mass index; CAD, coronary artery disease; DM2, diabetes mellitus type 2; HTN, hypertension; LDL-C, low-density lipoprotein cholesterol; NA, not available.

See Table S1 for trial name abbreviations

**†Estimated from median and interquartile range**



**Table S3.** Random effects meta-regression analysis showing the study-level association between baseline low-density lipoprotein cholesterol (left) and treatment difference vs. control in percent LDL-C reduction from baseline (right) and cardiovascular/safety end points

| End point                     | Moderator variable              |       |                                                                     |       |                                 |       |
|-------------------------------|---------------------------------|-------|---------------------------------------------------------------------|-------|---------------------------------|-------|
|                               | Baseline LDL-C                  |       | Treatment difference vs. control in % LDL-C reduction from baseline |       | PCSK9i treatment duration       |       |
|                               | Regression coefficient (95% CI) | p     | Regression coefficient (95% CI)                                     | p     | Regression coefficient (95% CI) | p     |
| All-cause mortality           | -0.02 (-0.05, 0.00)             | 0.038 | -0.02 (-0.07, 0.02)                                                 | 0.358 | 0.01 (0.00, 0.02)               | 0.012 |
| CV mortality                  | -0.02 (-0.05, 0.01)             | 0.196 | -0.01 (-0.06, 0.03)                                                 | 0.621 | 0.00 (0.00, 0.01)               | 0.197 |
| Myocardial infarction         | 0.00 (-0.01, 0.01)              | 0.976 | 0.03 (0.00, 0.06)                                                   | 0.075 | 0.00 (-0.01, 0.01)              | 0.943 |
| Stroke                        | 0.02 (-0.01, 0.05)              | 0.166 | 0.00 (-0.06, 0.06)                                                  | 0.954 | -0.01 (-0.02, 0.01)             | 0.414 |
| Coronary revascularization    | 0.00 (0.00, 0.01)               | 0.281 | 0.04 (0.01, 0.06)                                                   | 0.012 | 0.00 (-0.01, 0.00)              | 0.487 |
| Unstable angina               | -0.01 (-0.05, 0.03)             | 0.487 | 0.03 (-0.08, 0.14)                                                  | 0.612 | 0.01 (-0.01, 0.02)              | 0.480 |
| CHF exacerbation              | 0.00 (-0.02, 0.02)              | 0.873 | -0.03 (-0.11, 0.04)                                                 | 0.400 | 0.00 (-0.01, 0.02)              | 0.674 |
| Neurocognitive adverse events | 0.00 (-0.01, 0.02)              | 0.862 | -0.03 (-0.07, 0.01)                                                 | 0.201 | 0.00 (-0.01, 0.01)              | 0.903 |
| Diabetes mellitus             | 0.00 (-0.01, 0.01)              | 0.938 | -0.02 (-0.06, 0.02)                                                 | 0.236 | 0.00 (-0.01, 0.01)              | 0.824 |

CHF, congestive heart failure; CV, cardiovascular; LDL-C, low-density lipoprotein cholesterol; PCSK9i, PCSK9inhibitor

**Table S4.** Subgroup analyses for cardiovascular/safety end points stratified by familial hypercholesterolemia, and background statin therapy

| End point                  | Population: FH vs. Non-FH/mixed, OR (95% CI) |                     |       | Statin intolerant/PCSK9i monotherapy, OR (95% CI) |                     |       |
|----------------------------|----------------------------------------------|---------------------|-------|---------------------------------------------------|---------------------|-------|
|                            | Non-FH/mixed                                 | FH                  | p     | No                                                | Yes                 | p     |
| All-cause mortality        | 0.99 (0.87, 1.13)                            | 6.72 (0.38, 119.95) | 0.194 | 1.00 (0.88, 1.14)                                 | 0.79 (0.07, 8.79)   | 0.846 |
| CV mortality               | 1.00 (0.84, 1.19)                            | 3.58 (0.18, 69.77)  | 0.401 | 1.01 (0.85, 1.19)                                 | -*                  | -     |
| Myocardial infarction      | 0.72 (0.64, 0.81)                            | 0.99 (0.25, 3.99)   | 0.999 | 0.72 (0.64, 0.81)                                 | 0.62 (0.19, 2.00)   | 0.999 |
| Stroke                     | 0.81(0.68, 0.97)                             | 1.53 (0.06, 37.66)  | 0.695 | 0.80 (0.67, 0.96)                                 | 4.54 (0.18, 112.74) | 0.290 |
| Coronary revascularization | 0.78 (0.72, 0.86)                            | 1.35 (0.39, 4.64)   | 0.842 | 0.78 (0.72, 0.86)                                 | 1.48 (0.46, 4.75)   | 0.346 |
| Unstable angina            | 0.97 (0.81, 1.16)                            | 1.53 (0.06, 37.66)  | 0.783 | 0.97 (0.82, 1.16)                                 | -*                  | -     |
| CHF exacerbation           | 0.98 (0.86, 1.13)                            | 1.51 (0.16, 14.65)  | 0.711 | 0.99 (0.86, 1.13)                                 | 0.19 (0.02, 2.16)   | 0.185 |
| Neurocognitive AEs         | 1.14 (0.95, 1.36)                            | 0.38 (0.09, 1.56)   | 0.160 | 1.11 (0.93, 1.33)                                 | 1.45 (0.16, 13.17)  | 0.809 |
| Diabetes mellitus          | 1.05 (0.95, 1.17)                            | 0.78 (0.30, 2.03)   | 0.532 | 1.05 (0.95, 1.16)                                 | 3.43 (0.38, 31.41)  | 0.278 |

AE, adverse event; CHF, congestive heart failure; CV, cardiovascular; FH, familial hypercholesterolemia; PCSK9i, proprotein convertase subtilisin-kexin type 9 inhibitor, \* There were no studies reporting events in these subgroups

**Table S5.** Random- and fixed-effects models for cardiovascular/safety end points

| End point                     | Meta-analysis model |        |                   |        |
|-------------------------------|---------------------|--------|-------------------|--------|
|                               | Fixed-effects       |        | Random effects    |        |
|                               | OR (95% CI)         | p      | OR (95% CI)       | p      |
| All-cause mortality           | 1.00 (0.88, 1.14)   | 0.999  | 0.71 (0.47, 1.09) | 0.119  |
| CV mortality                  | 1.01 (0.85, 1.19)   | 0.936  | 1.01 (0.85, 1.19) | 0.954  |
| Myocardial infarction         | 0.72 (0.64, 0.81)   | <0.001 | 0.72 (0.64, 0.81) | <0.001 |
| Stroke                        | 0.81 (0.68, 0.97)   | 0.02   | 0.80 (0.67, 0.96) | 0.017  |
| Coronary revascularization    | 0.79 (0.72, 0.86)   | <0.001 | 0.78 (0.71, 0.86) | <0.001 |
| Unstable angina               | 0.97 (0.82, 1.16)   | 0.762  | 0.97 (0.82, 1.16) | 0.767  |
| CHF exacerbation              | 0.98 (0.86, 1.13)   | 0.8    | 0.98 (0.86, 1.13) | 0.789  |
| Neurocognitive adverse events | 1.12 (0.94, 1.33)   | 0.218  | 1.12 (0.88, 1.42) | 0.366  |
| Diabetes mellitus             | 1.05 (0.95, 1.16)   | 0.337  | 1.05 (0.95, 1.17) | 0.32   |

CHF, congestive heart failure; CV, cardiovascular

**Table S6.** Egger's regression test for cardiovascular/safety endpoints

| <b>End point</b>                     | <b>p</b> |
|--------------------------------------|----------|
| <b>All-cause mortality</b>           | 0.131    |
| <b>Cardiovascular mortality</b>      | 0.268    |
| <b>Myocardial infarction</b>         | 0.937    |
| <b>Unstable angina</b>               | 0.393    |
| <b>Stroke</b>                        | 0.186    |
| <b>CHF exacerbation</b>              | 0.734    |
| <b>Coronary revascularization</b>    | 0.098    |
| <b>Neurocognitive adverse events</b> | 0.549    |
| <b>Diabetes mellitus</b>             | 0.856    |

CHF, congestive heart failure

**Figure S1.** PRISMA (Preferred Reporting Items for Systematic Reviews and Meta-Analyses) meta-analysis flowchart

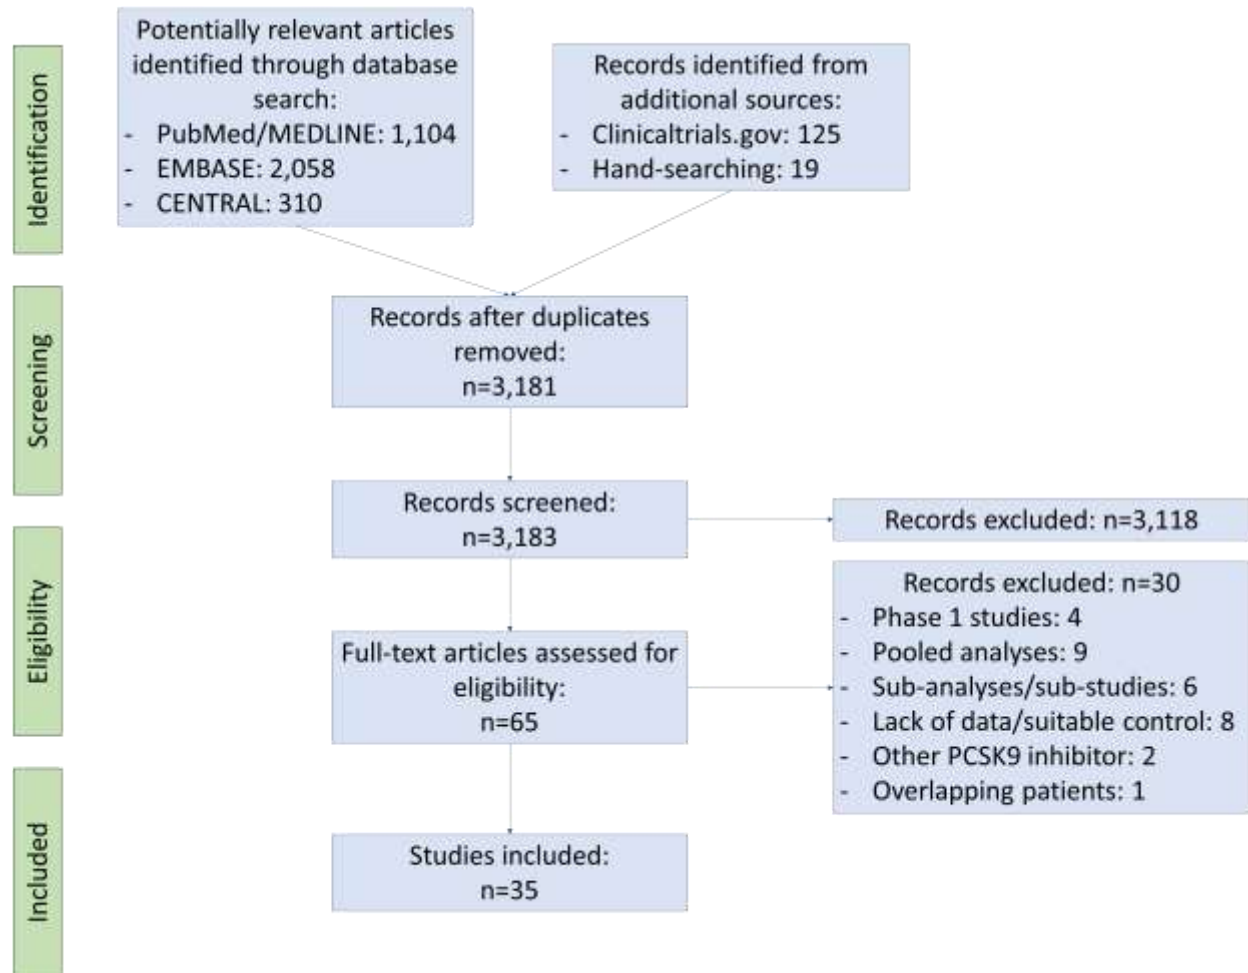

**Figure S2.** Risk of bias assessment of included studies

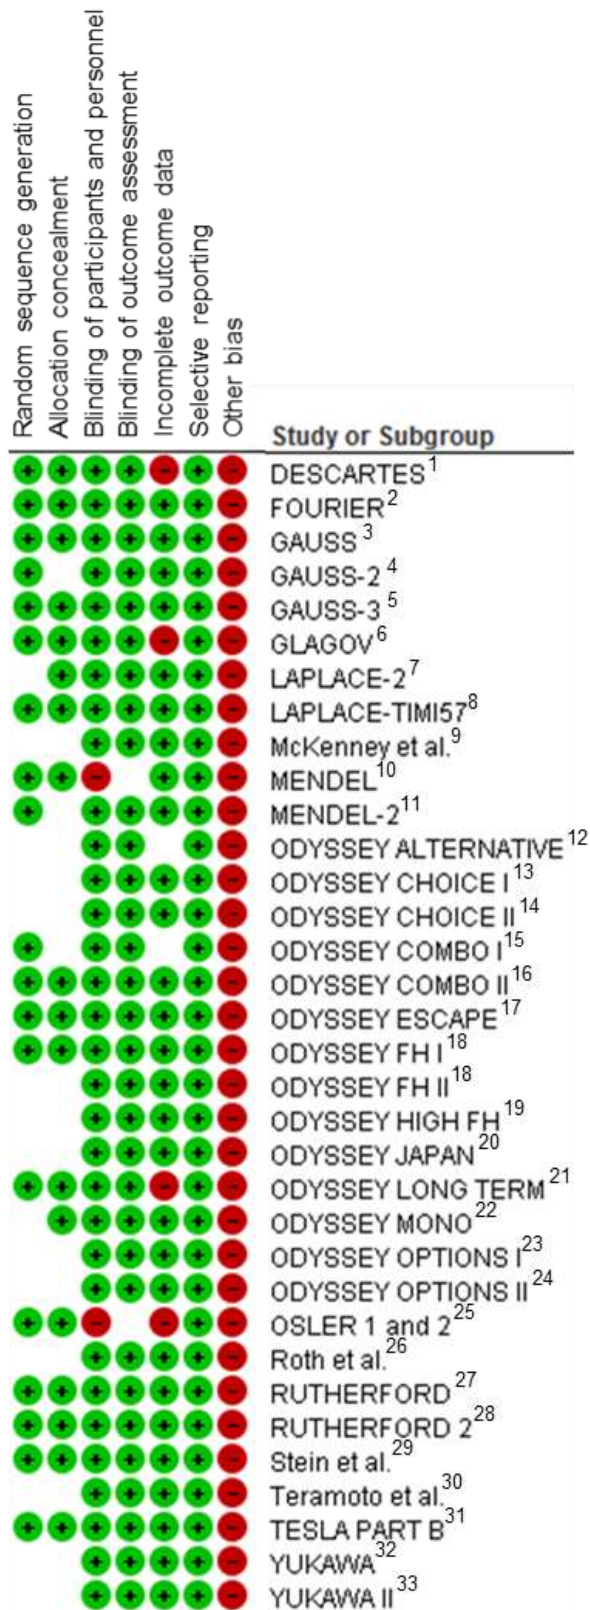

**Figure S3. Unstable angina**

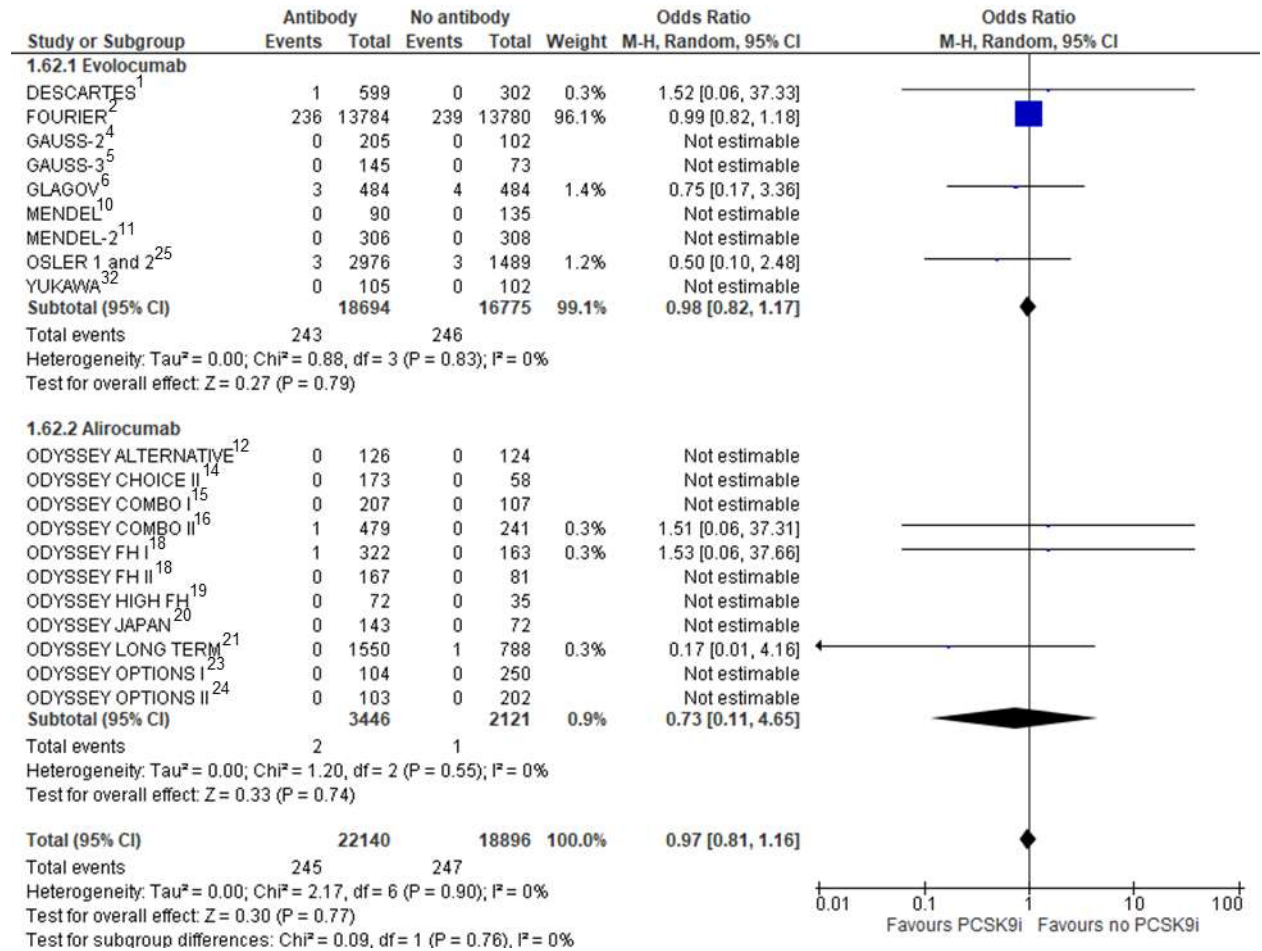

**Figure S4.** Congestive heart failure exacerbation

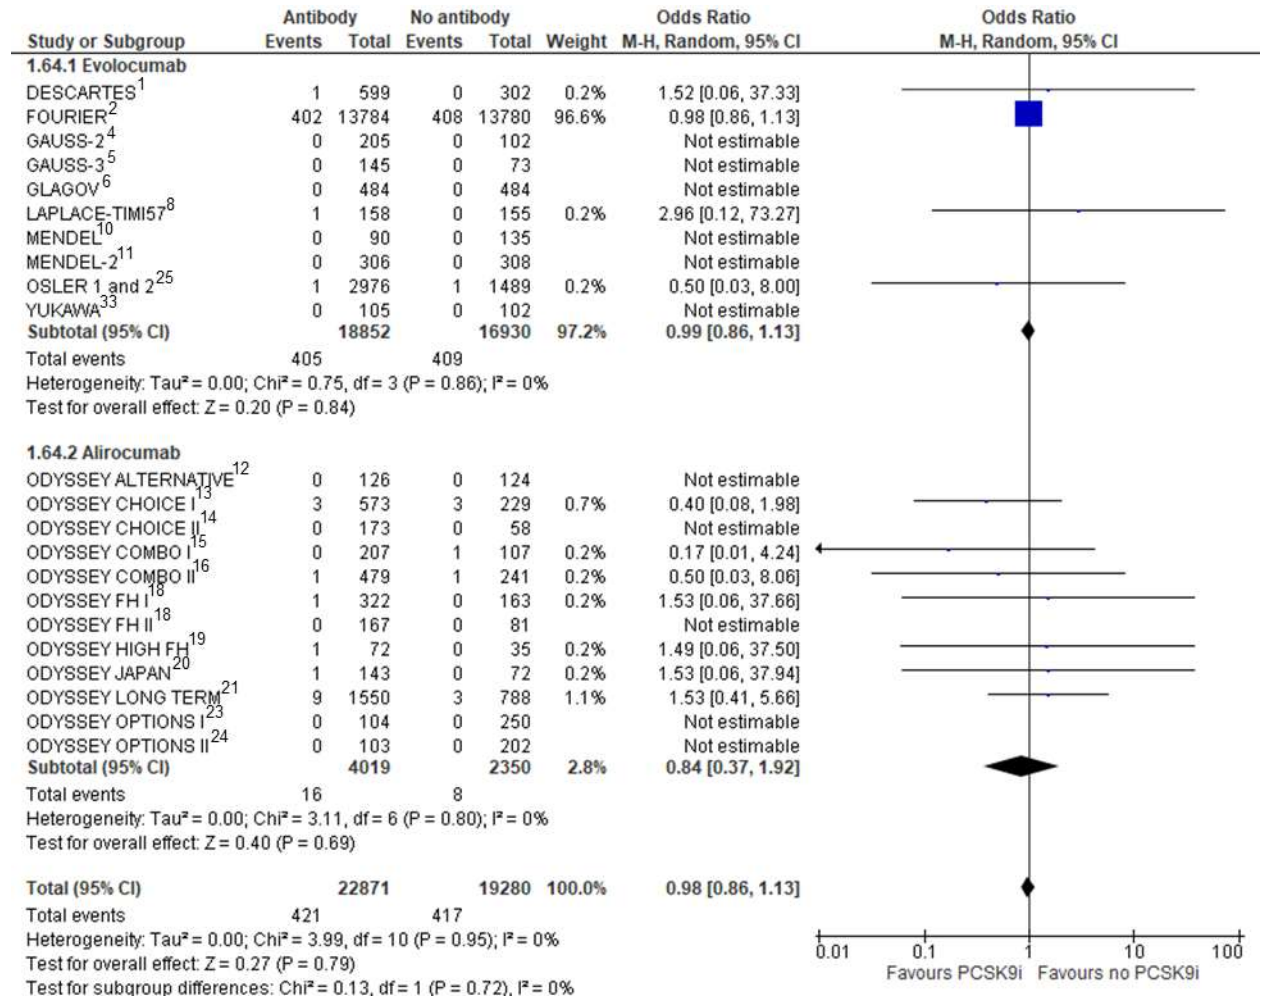



**Figure S5. Diabetes mellitus**

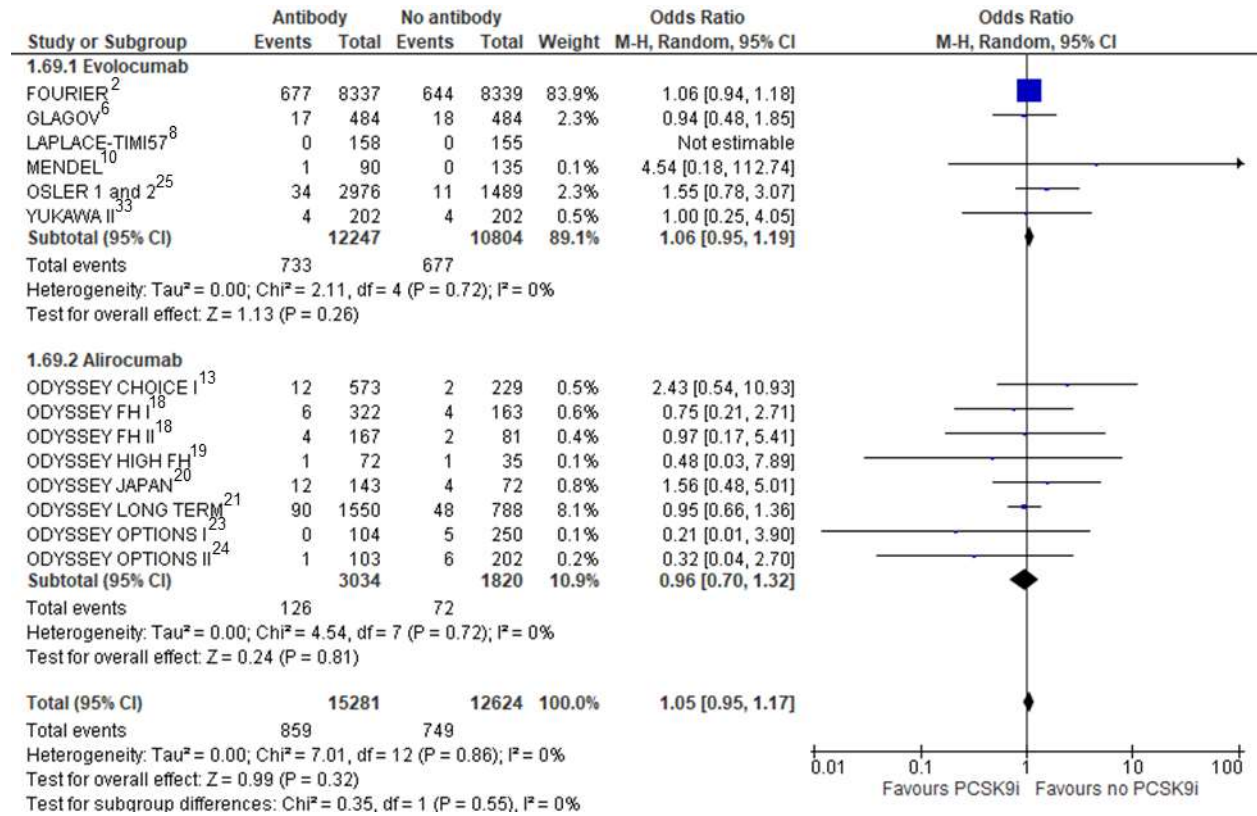

**Figure S6.** Increase in creatine kinase

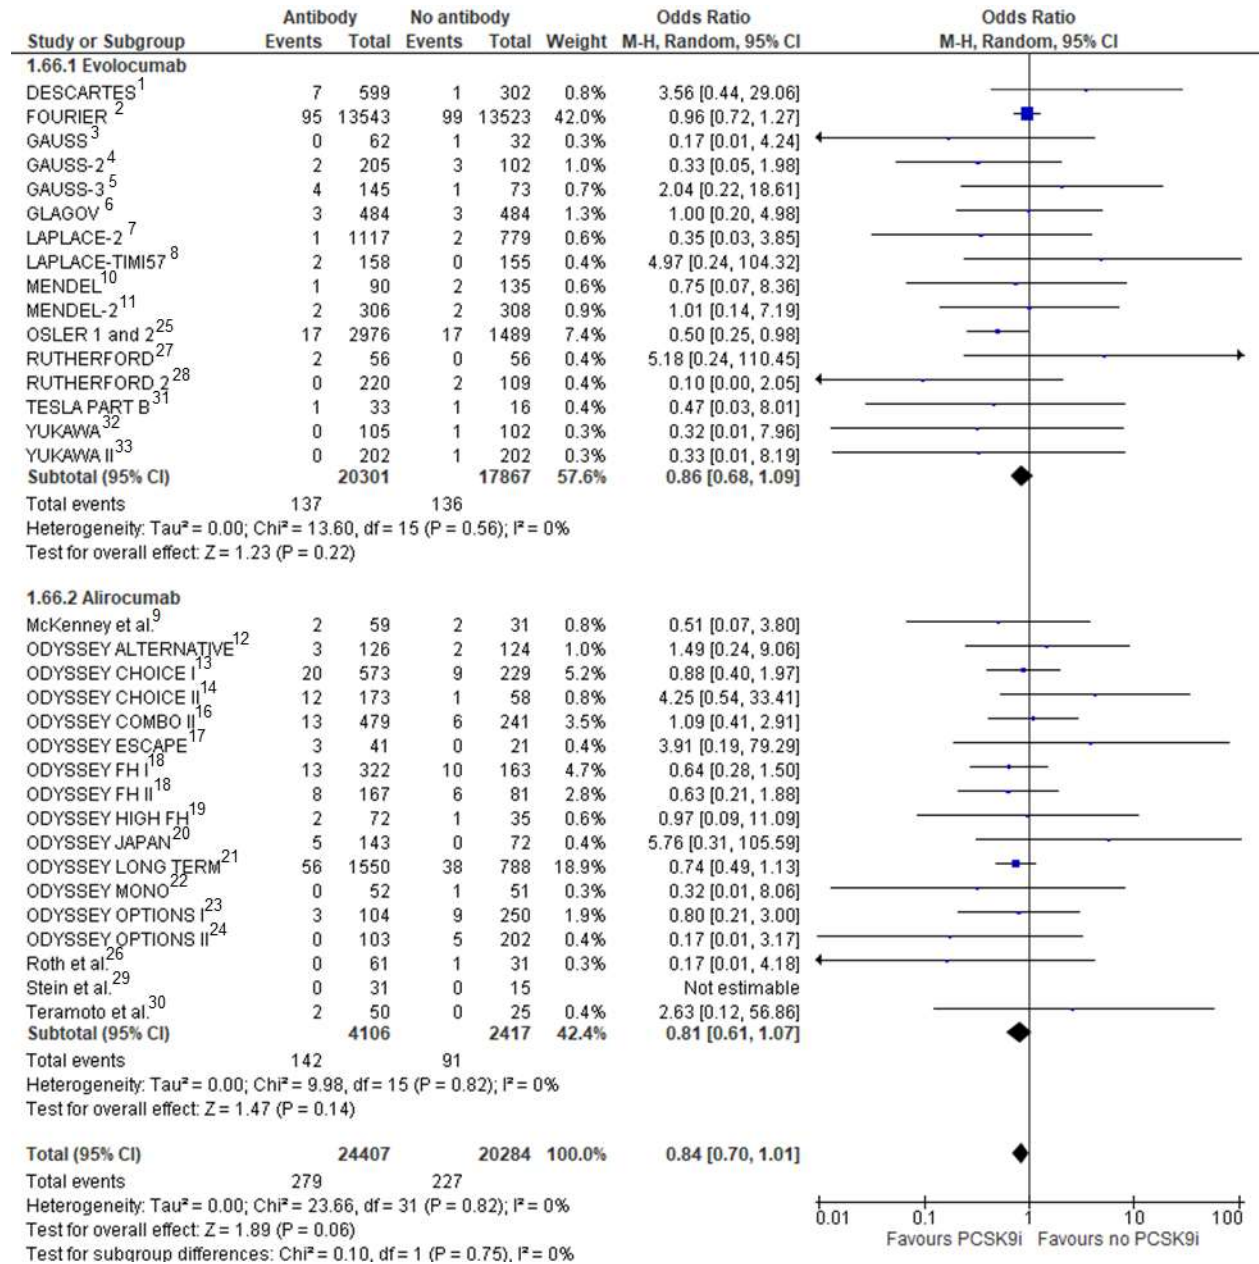

**Figure S7. Myalgia**

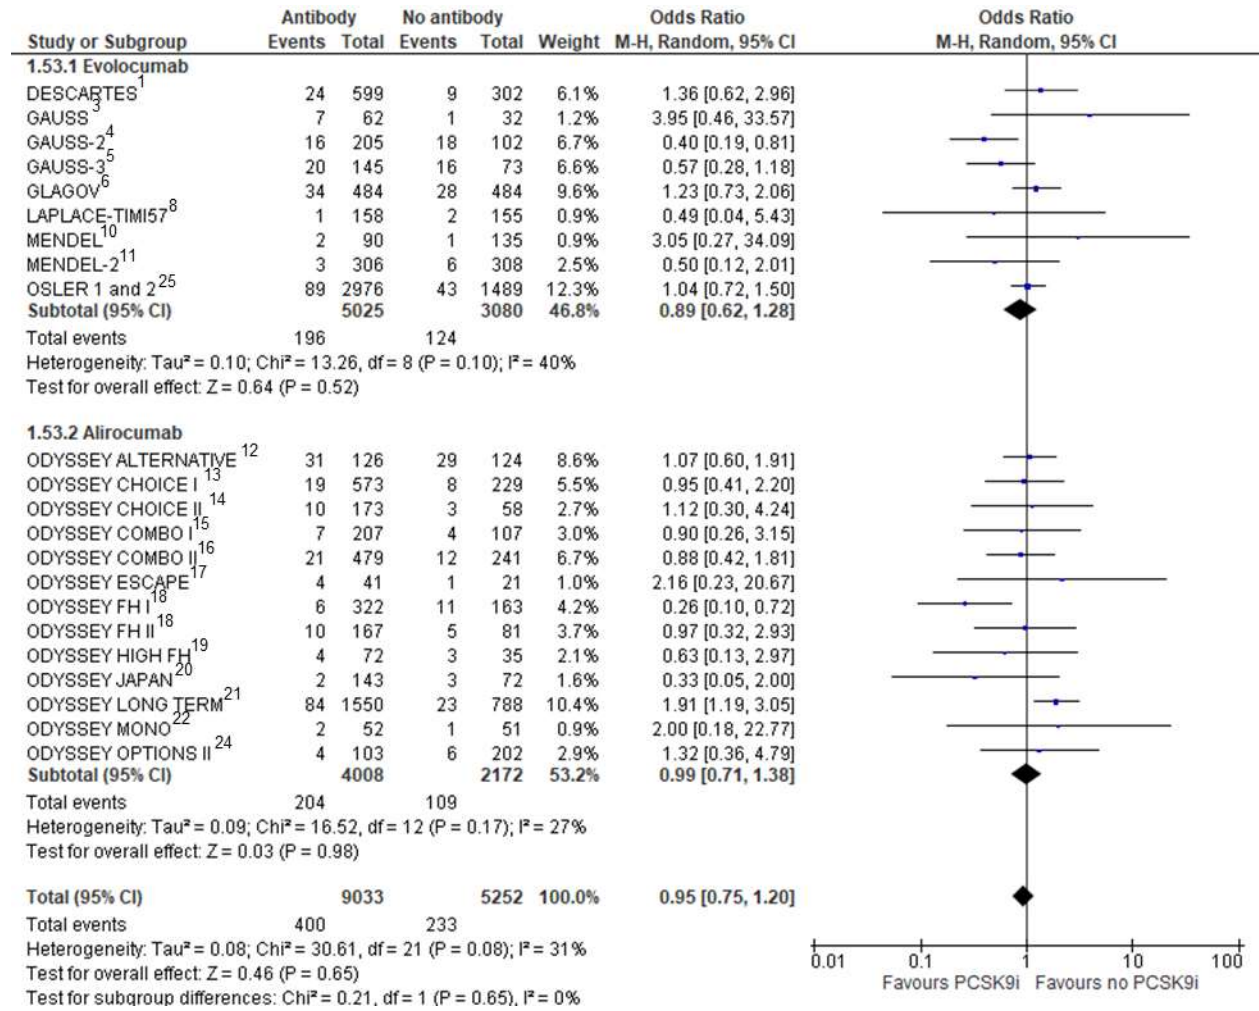

**Figure S8.** Alanine/aspartate aminotransferase increase

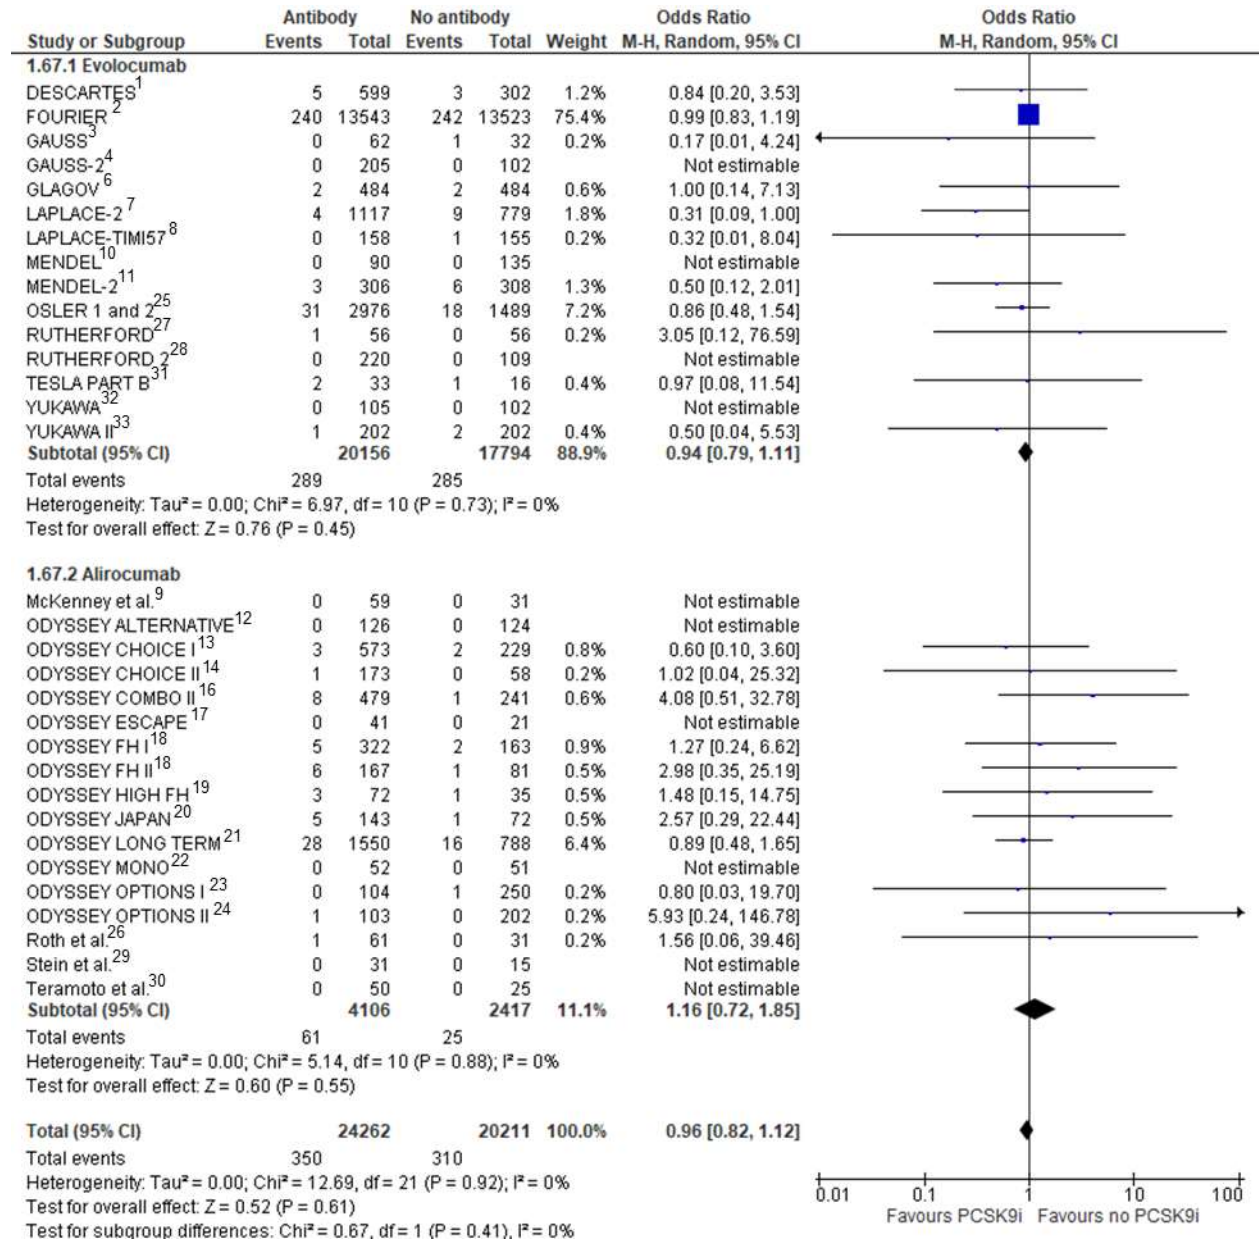

**Figure S9.** Treatment emergent serious adverse events

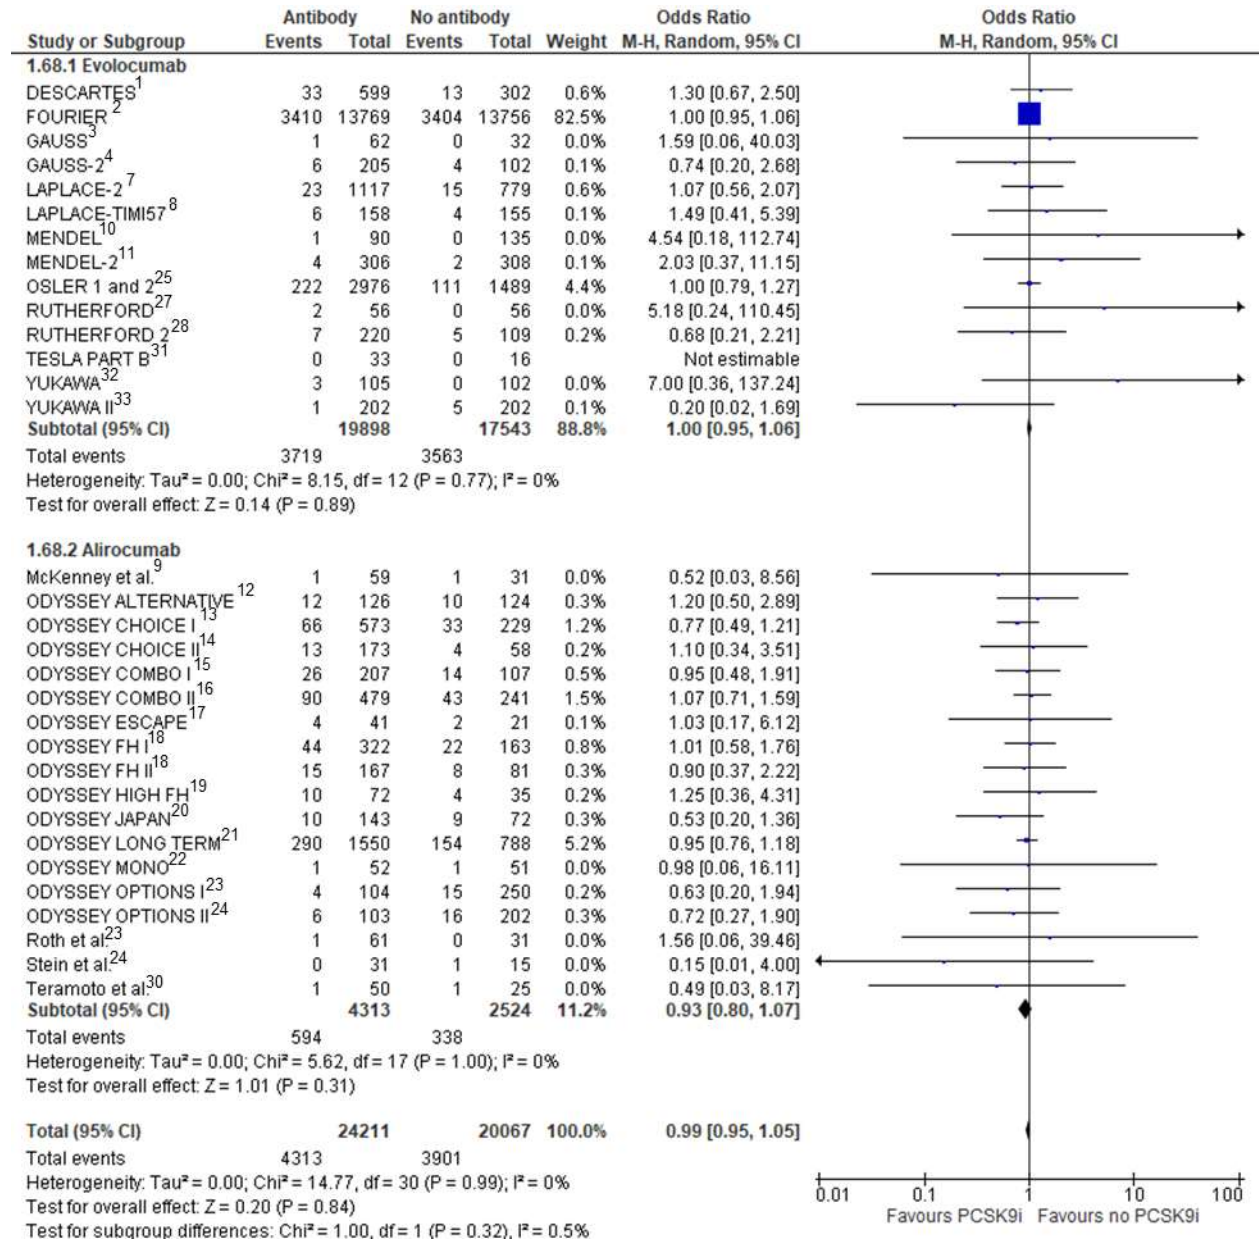

**Figure S10.** Low-density lipoprotein cholesterol % change from baseline

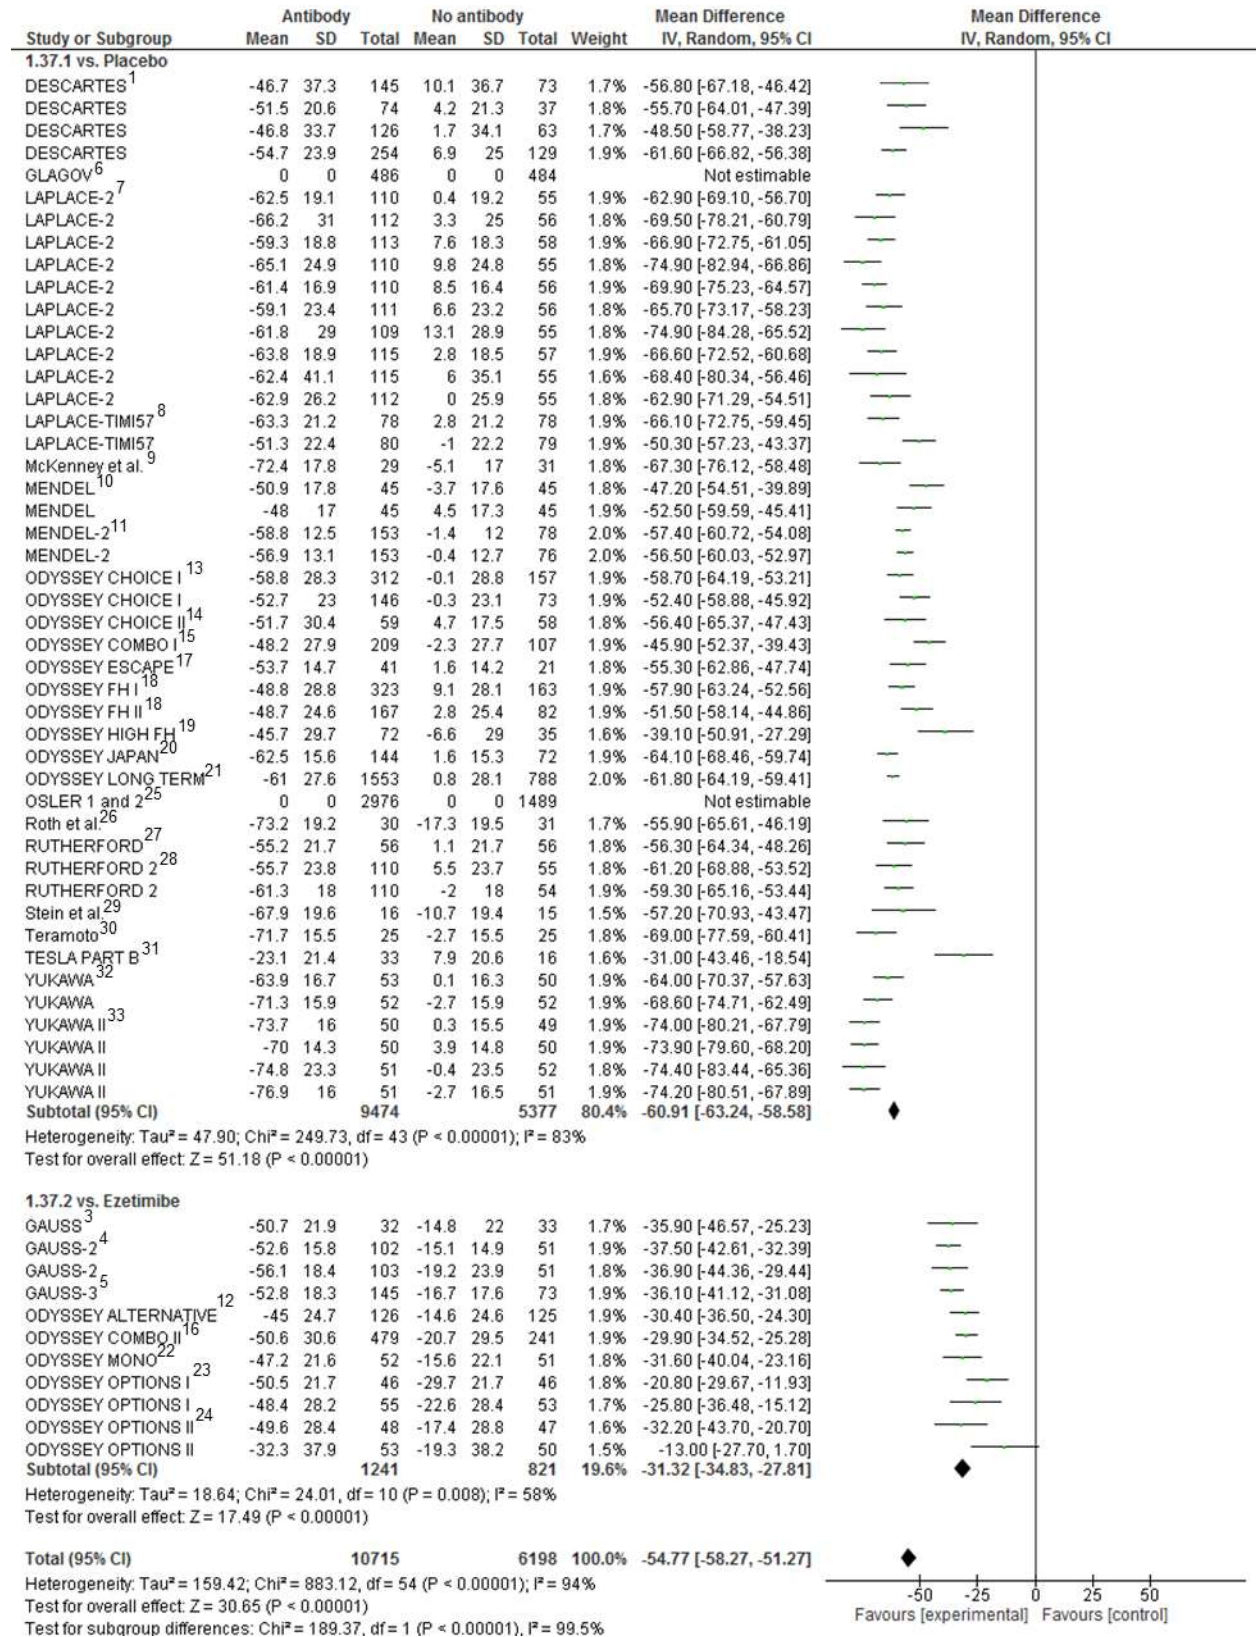

**Figure S11.** High-density lipoprotein cholesterol % change from baseline

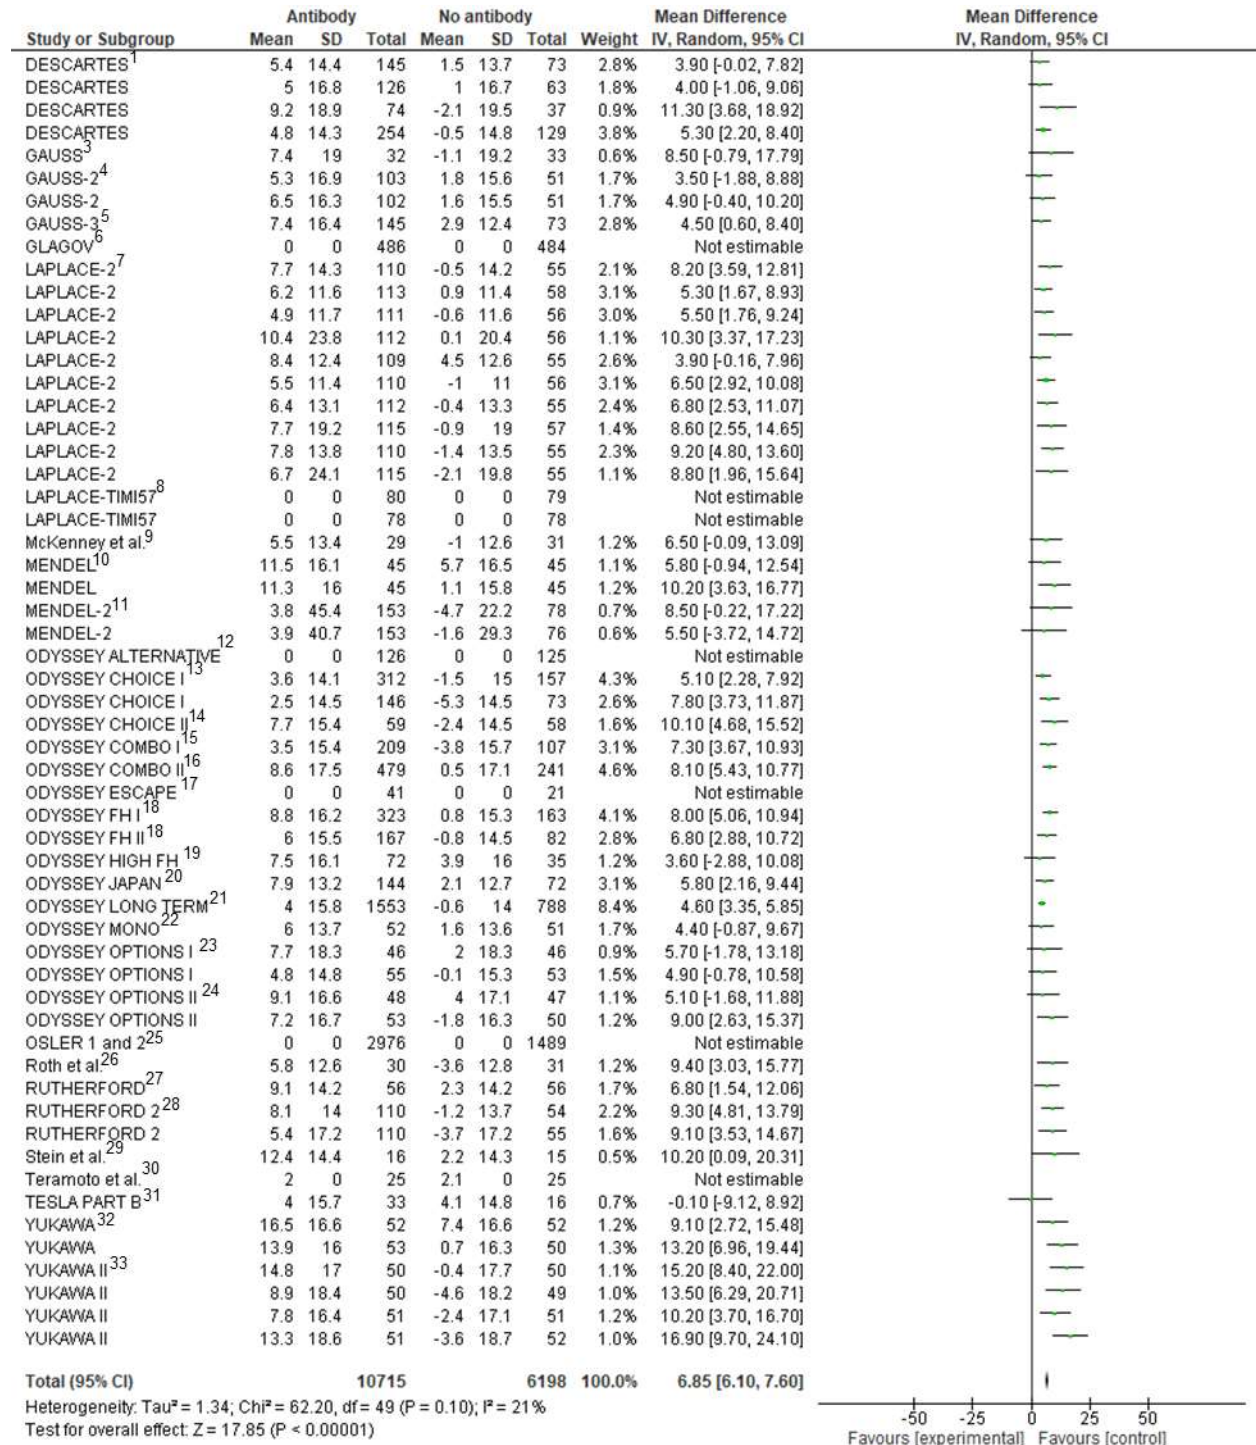

**Figure S12.** Total cholesterol % change from baseline

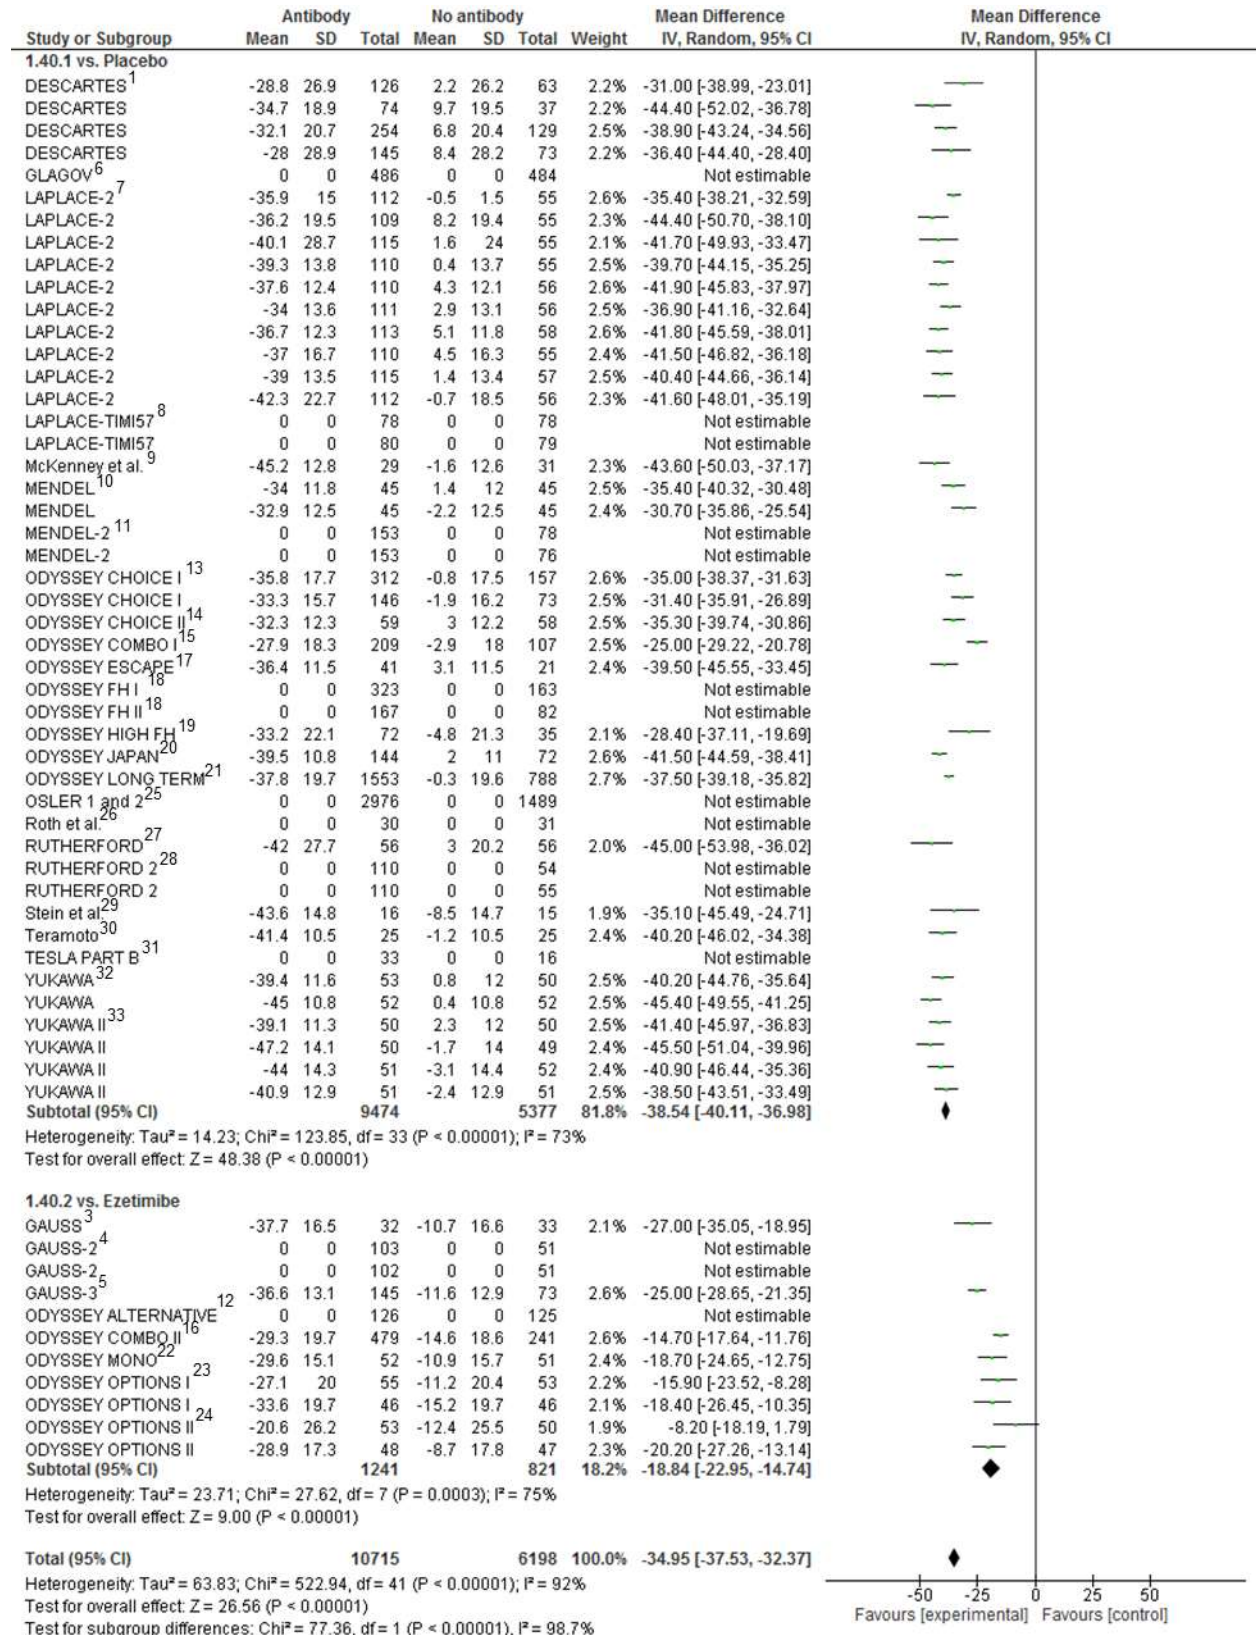



**Figure S13.** Lipoprotein(a) % change from baseline

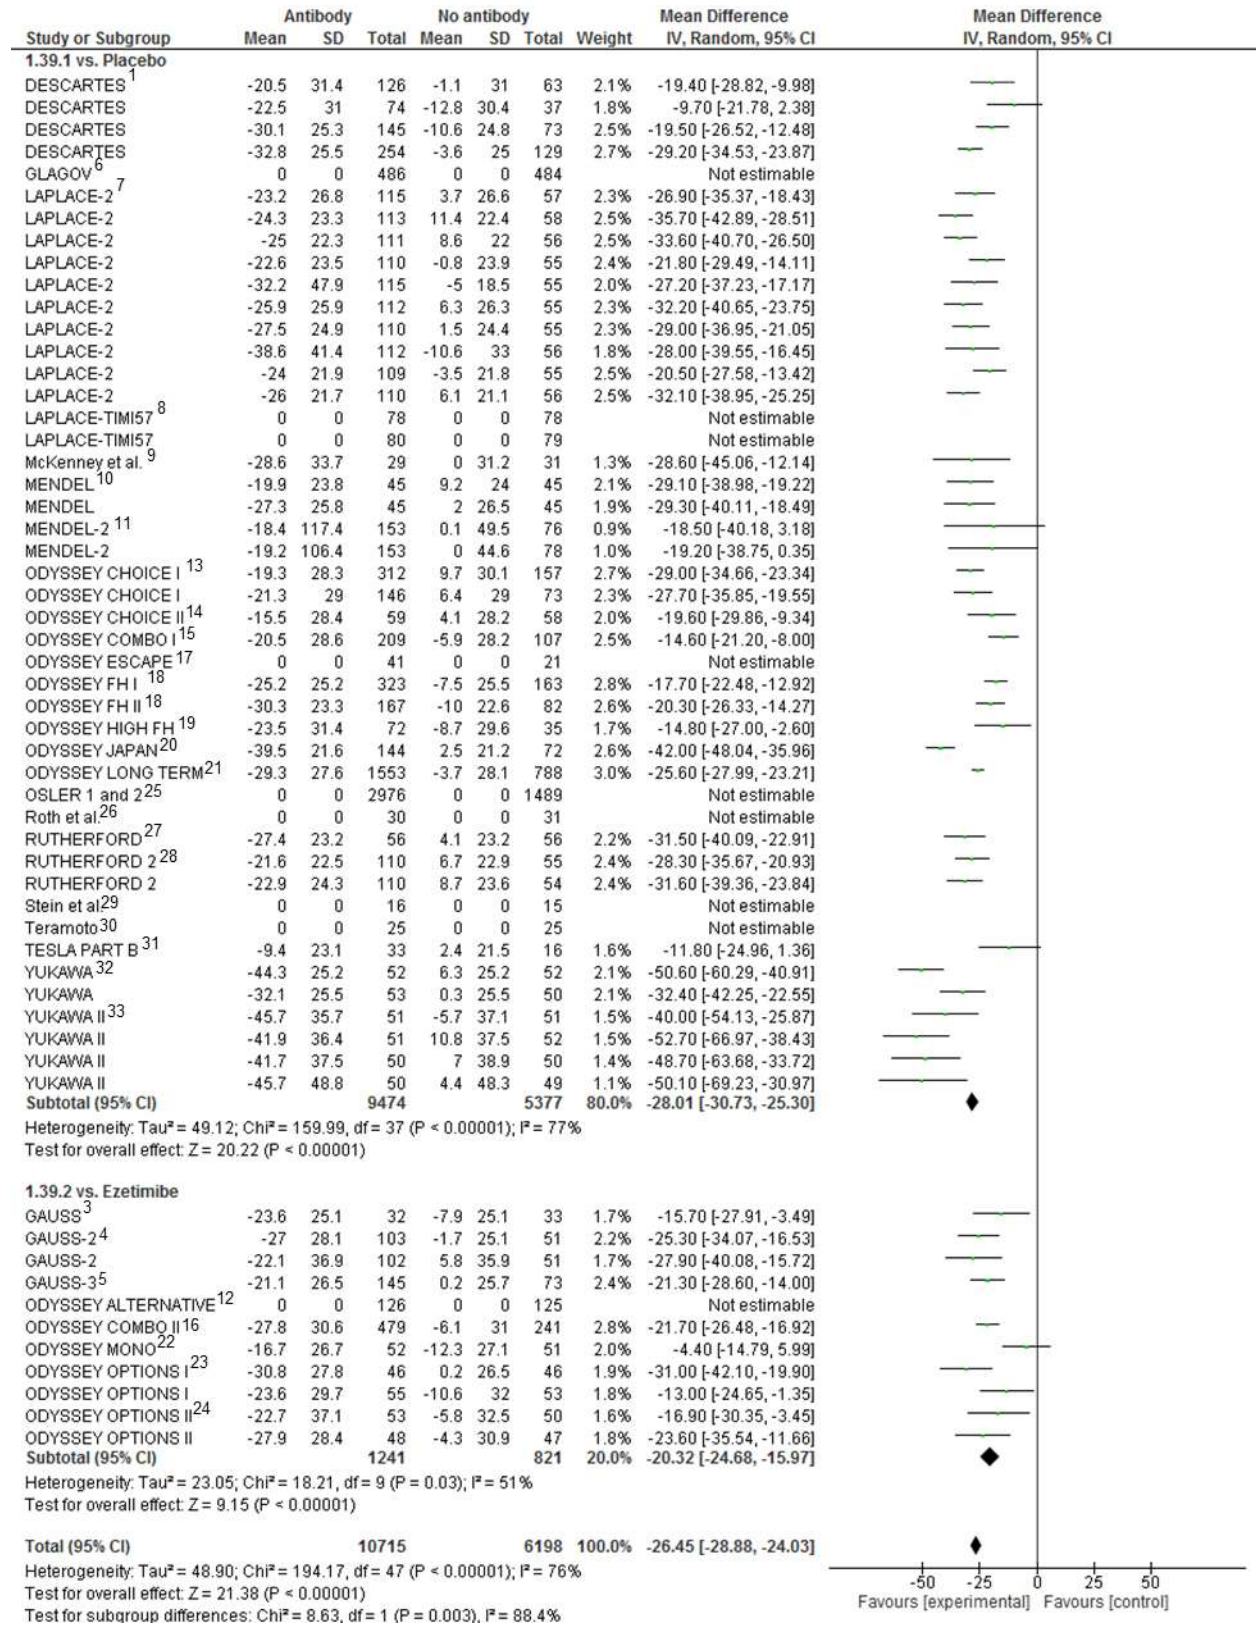

**Figure S14.** Apolipoprotein B % change from baseline

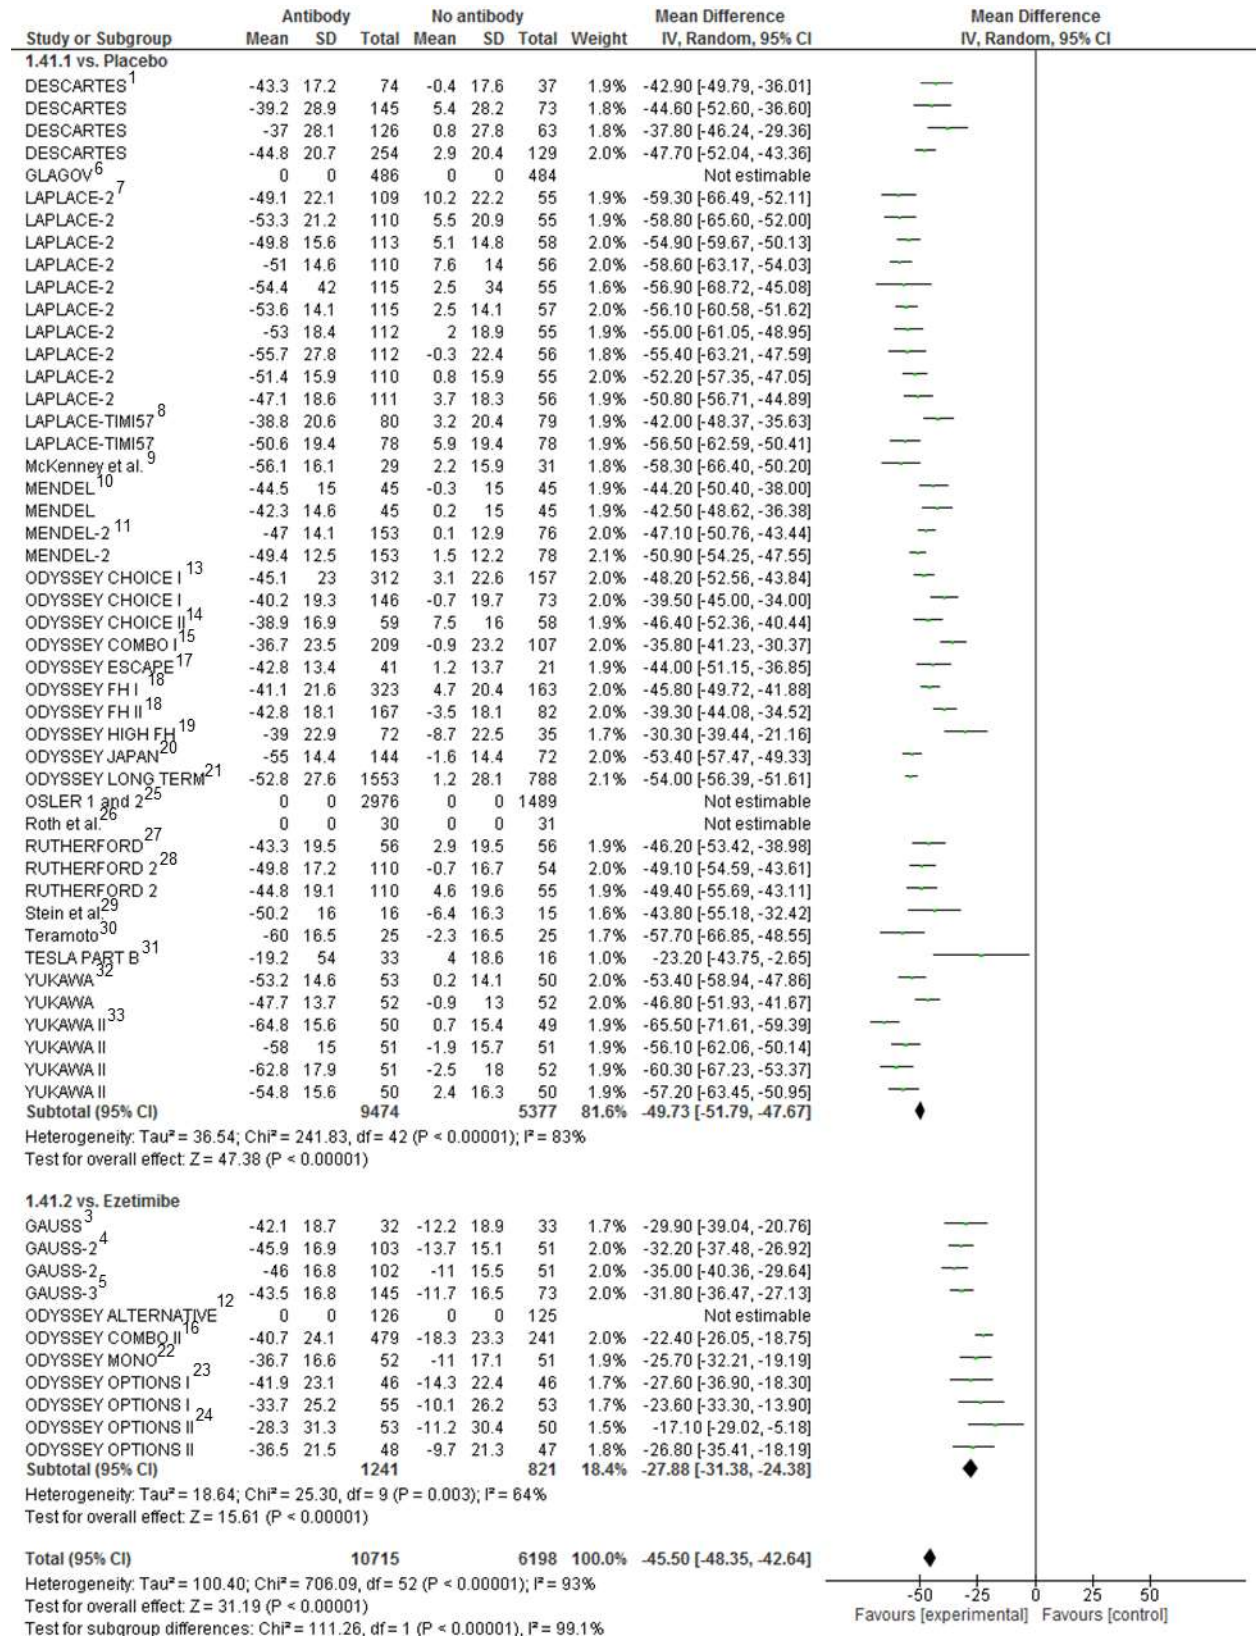

**Figure S15.** Funnel plot: all-cause mortality

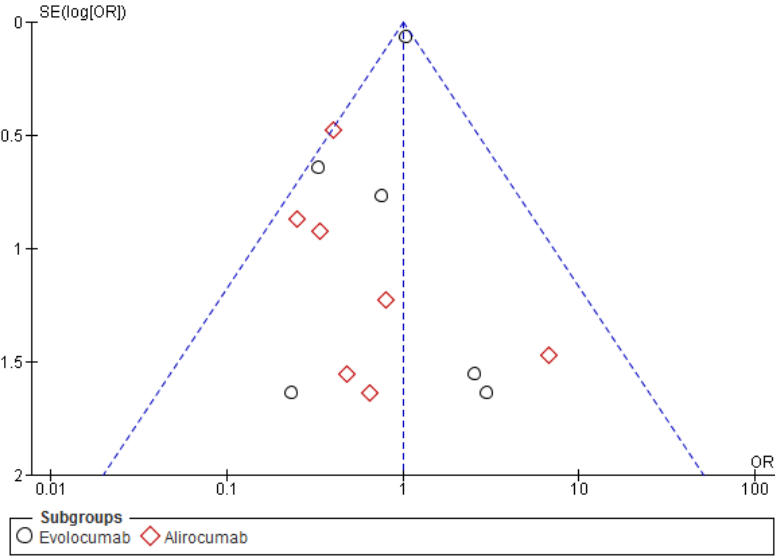

**Figure S16.** Funnel plot: cardiovascular mortality

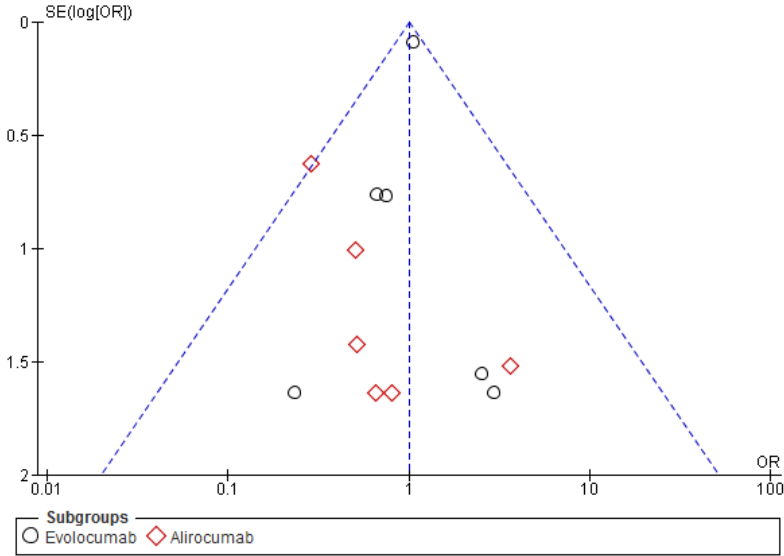

**Figure S17.** Funnel plot: myocardial infarction

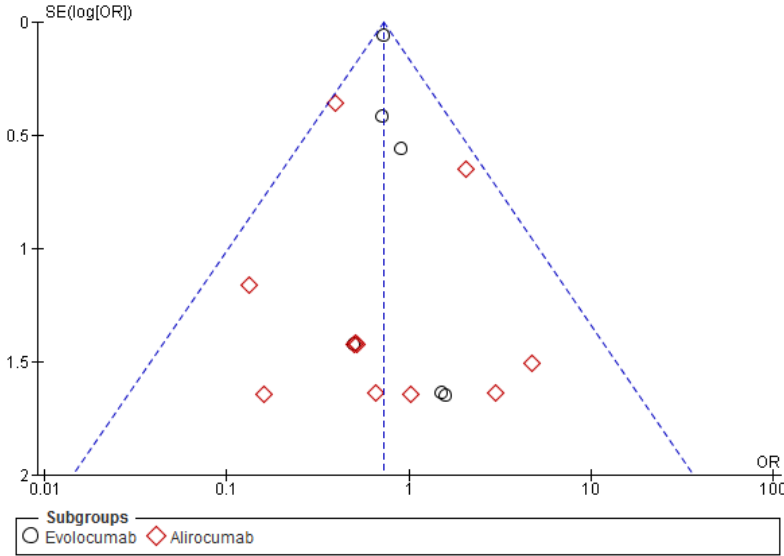

**Figure S18.** Funnel plot: stroke

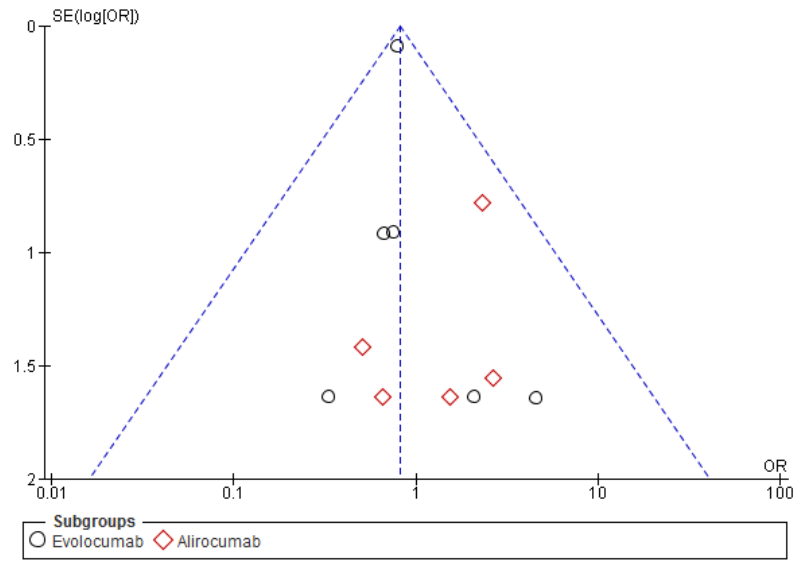

**Figure S19.** Funnel plot: coronary revascularization

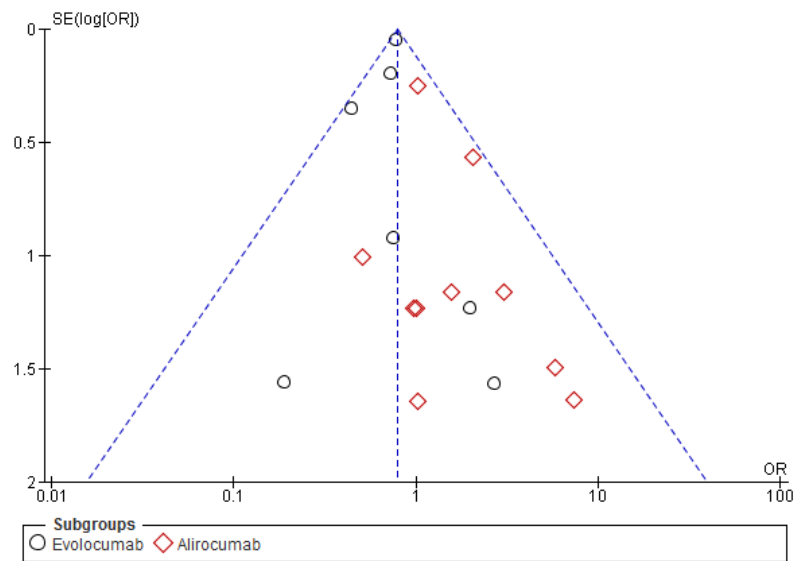

**Figure S20.** Funnel plot: unstable angina

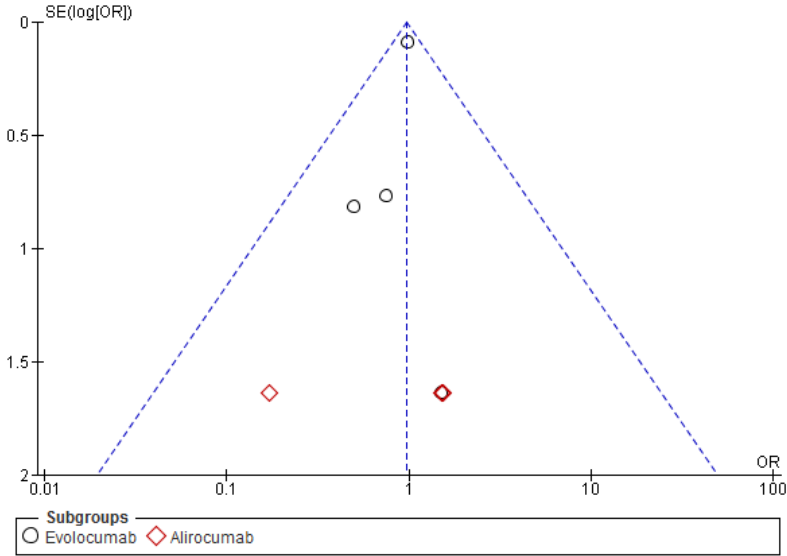

**Figure S21.** Funnel plot: congestive heart failure exacerbation

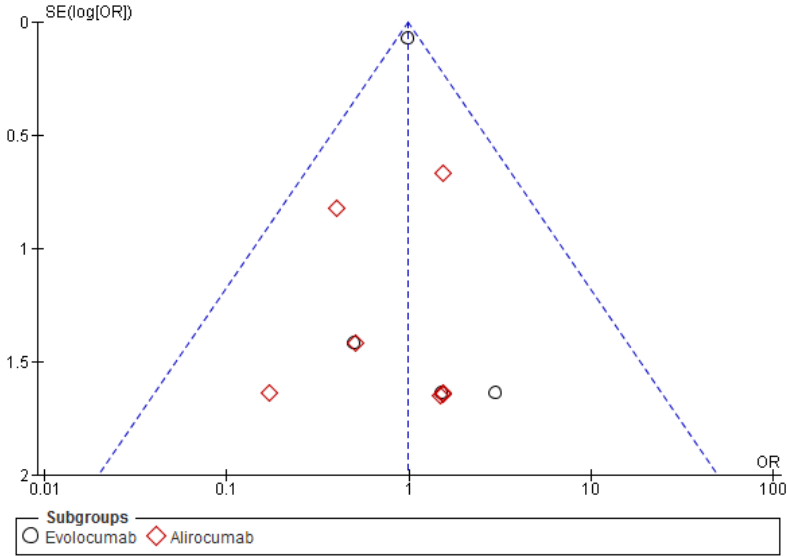

**Figure S22.** Funnel plot: neurocognitive adverse events

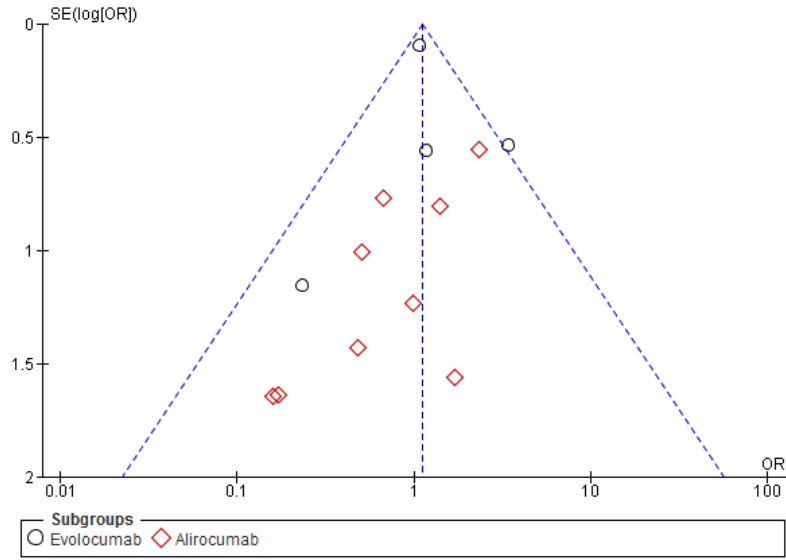

**Figure S23.** Funnel plot: diabetes mellitus

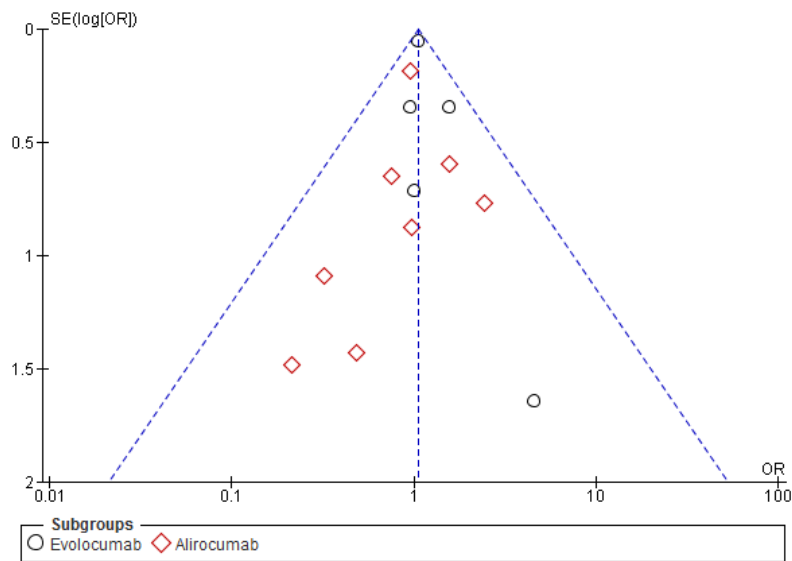

**Figure S24.** Funnel plot: increase in creatine kinase

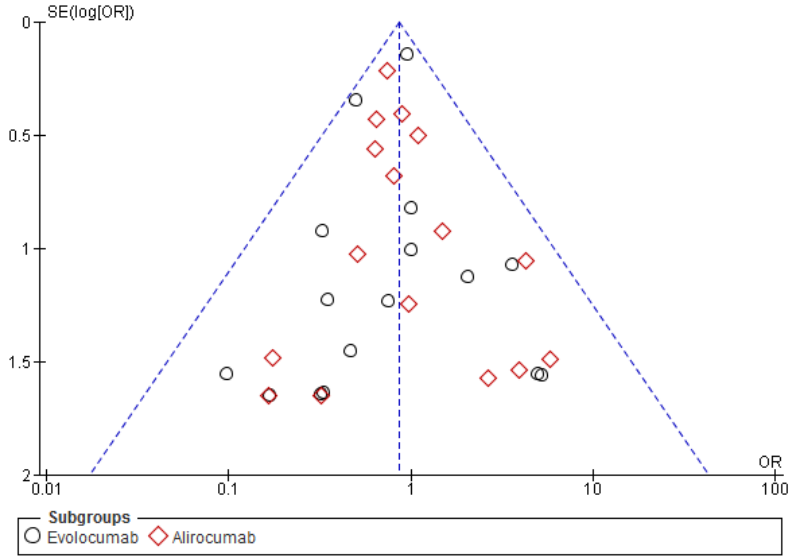

**Figure S25.** Funnel plot: myalgia

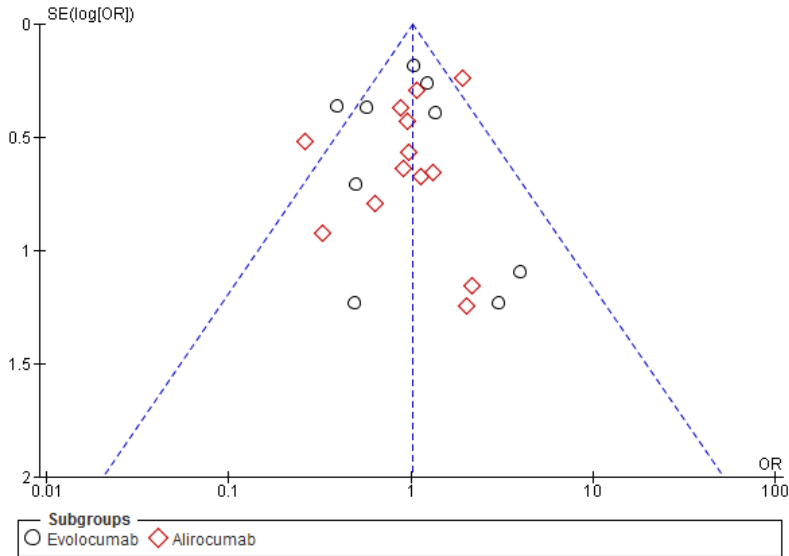



**Figure S26.** Funnel plot: increase in alanine/aspartate aminotransferase

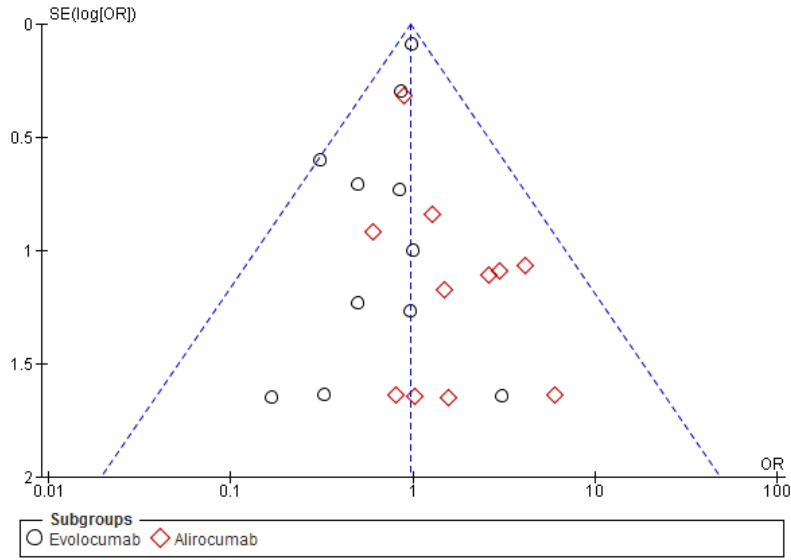

**Figure S27.** Funnel plot: treatment emergent serious adverse events

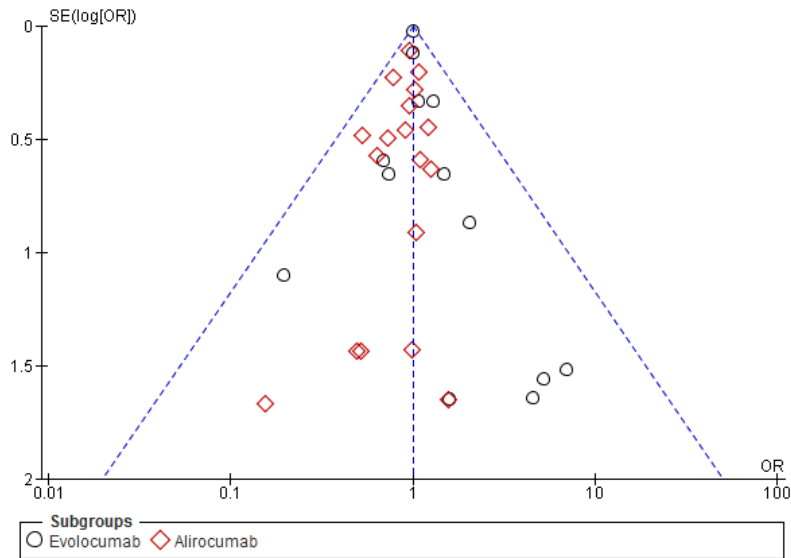

**Figure S28.** Funnel plot: LDL- Cholesterol

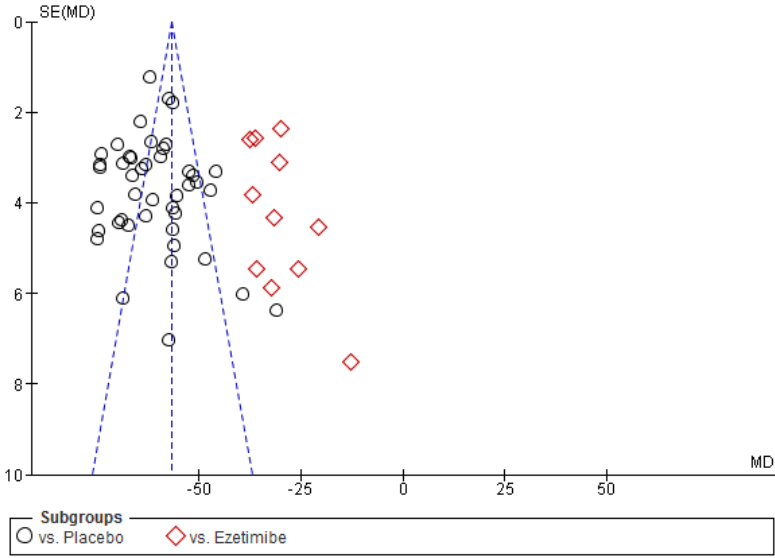

**Figure S29.** Funnel plot: HDL- cholesterol

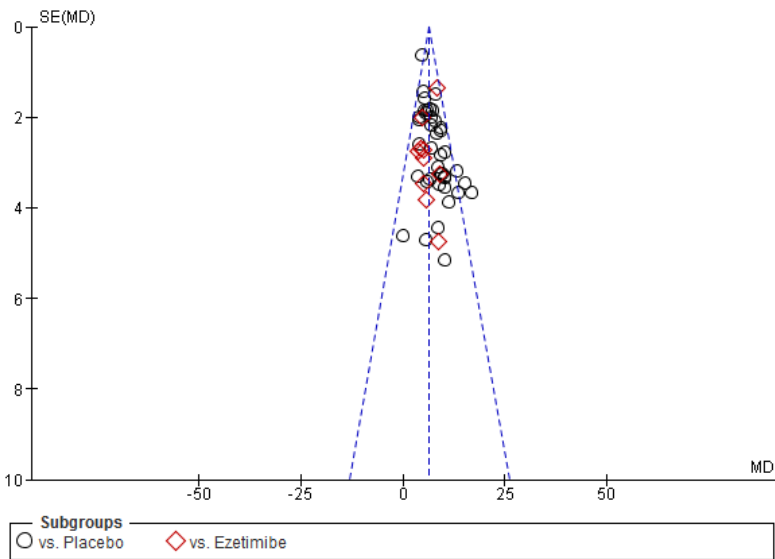

**Figure S30.** Funnel plot: total cholesterol

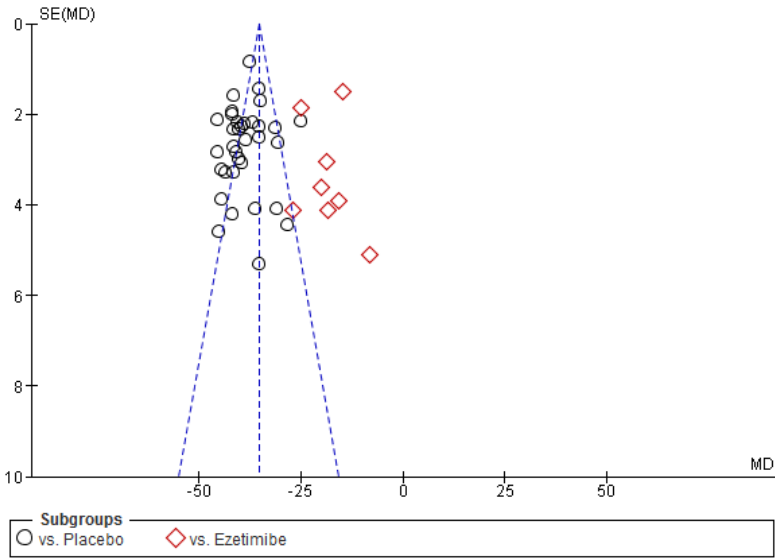

**Figure S31.** Funnel plot: lipoprotein(a)

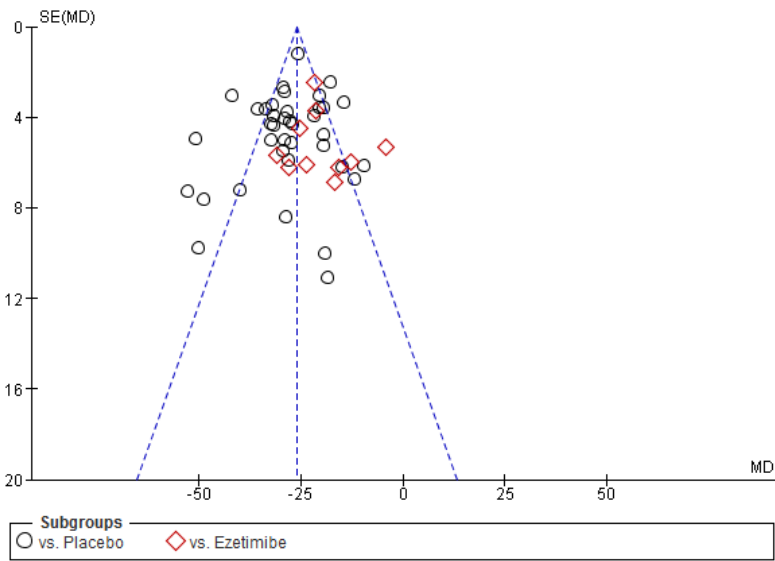

**Figure S32.** Funnel plot: apolipoprotein B

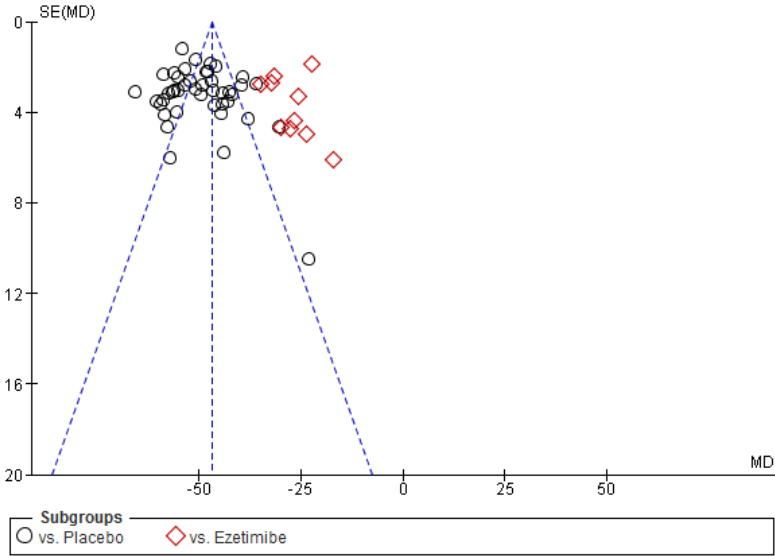

## Supplemental References:

1. Blom DJ, Hala T, Bolognese M, Lillestol MJ, Toth PD, Burgess L, Ceska R, Roth E, Koren MJ, Ballantyne CM, Monsalvo ML, Tsirtsonis K, Kim JB, Scott R, Wasserman SM, Stein EA and Investigators D. A 52-week placebo-controlled trial of evolocumab in hyperlipidemia. *N Engl J Med.* 2014;370:1809-19.
2. Sabatine MS, Giugliano RP, Keech AC, Honarpour N, Wiviott SD, Murphy SA, Kuder JF, Wang H, Liu T, Wasserman SM, Sever PS, Pedersen TR, Committee FS and Investigators. Evolocumab and Clinical Outcomes in Patients with Cardiovascular Disease. *N Engl J Med.* 2017;376:1713-1722.
3. Sullivan D, Olsson AG, Scott R, Kim JB, Xue A, GebSKI V, Wasserman SM and Stein EA. Effect of a monoclonal antibody to PCSK9 on low-density lipoprotein cholesterol levels in statin-intolerant patients: the GAUSS randomized trial. *Jama.* 2012;308:2497-506.
4. Stroes E, Colquhoun D, Sullivan D, Civeira F, Rosenson RS, Watts GF, Bruckert E, Cho L, Dent R, Knusel B, Xue A, Scott R, Wasserman SM, Rocco M and Investigators G-. Anti-PCSK9 antibody effectively lowers cholesterol in patients with statin intolerance: the GAUSS-2 randomized, placebo-controlled phase 3 clinical trial of evolocumab. *J Am Coll Cardiol.* 2014;63:2541-8.
5. Nissen SE, Dent-Acosta RE, Rosenson RS, Stroes E, Sattar N, Preiss D, Mancini GB, Ballantyne CM, Catapano A, Gouni-Berthold I, Stein EA, Xue A, Wasserman SM, Scott R, Thompson PD and Investigators G-. Comparison of PCSK9 Inhibitor Evolocumab vs Ezetimibe in Statin-Intolerant Patients: Design of the Goal Achievement After Utilizing an Anti-PCSK9 Antibody in Statin-Intolerant Subjects 3 (GAUSS-3) Trial. *Clin Cardiol.* 2016;39:137-44.
6. Nicholls SJ, Puri R, Anderson T, Ballantyne CM, Cho L, Kastelein JJ, Koenig W, Somaratne R, Kassahun H, Yang J, Wasserman SM, Scott R, Ungi I, Podolec J, Ophuis AO,

Cornel JH, Borgman M, Brennan DM and Nissen SE. Effect of Evolocumab on Progression of Coronary Disease in Statin-Treated Patients: The GLAGOV Randomized Clinical Trial. *Jama*. 2016;316:2373-2384.

7. Robinson JG, Nedergaard BS, Rogers WJ, Fialkow J, Neutel JM, Ramstad D, Somaratne R, Legg JC, Nelson P, Scott R, Wasserman SM, Weiss R and Investigators L-. Effect of evolocumab or ezetimibe added to moderate- or high-intensity statin therapy on LDL-C lowering in patients with hypercholesterolemia: the LAPLACE-2 randomized clinical trial. *JAMA*. 2014;311:1870-82.

8. Giugliano RP, Desai NR, Kohli P, Rogers WJ, Somaratne R, Huang F, Liu T, Mohanavelu S, Hoffman EB, McDonald ST, Abrahamsen TE, Wasserman SM, Scott R, Sabatine MS and Investigators L-T. Efficacy, safety, and tolerability of a monoclonal antibody to proprotein convertase subtilisin/kexin type 9 in combination with a statin in patients with hypercholesterolaemia (LAPLACE-TIMI 57): a randomised, placebo-controlled, dose-ranging, phase 2 study. *Lancet*. 2012;380:2007-17.

9. McKenney JM, Koren MJ, Kereiakes DJ, Hanotin C, Ferrand AC and Stein EA. Safety and efficacy of a monoclonal antibody to proprotein convertase subtilisin/kexin type 9 serine protease, SAR236553/REGN727, in patients with primary hypercholesterolemia receiving ongoing stable atorvastatin therapy. *J Am Coll Cardiol*. 2012;59:2344-53.

10. Koren MJ, Scott R, Kim JB, Knusel B, Liu T, Lei L, Bolognese M and Wasserman SM. Efficacy, safety, and tolerability of a monoclonal antibody to proprotein convertase subtilisin/kexin type 9 as monotherapy in patients with hypercholesterolaemia (MENDEL): a randomised, double-blind, placebo-controlled, phase 2 study. *Lancet*. 2012;380:1995-2006.

11. Koren MJ, Lundqvist P, Bolognese M, Neutel JM, Monsalvo ML, Yang J, Kim JB, Scott R, Wasserman SM, Bays H and Investigators M-. Anti-PCSK9 monotherapy for hypercholesterolemia: the MENDEL-2 randomized, controlled phase III clinical trial of evolocumab. *J Am Coll Cardiol*. 2014;63:2531-40.

12. Moriarty PM, Thompson PD, Cannon CP, Guyton JR, Bergeron J, Zieve FJ, Bruckert E, Jacobson TA, Kopecky SL, Baccara-Dinet MT, Du Y, Pordy R, Gipe DA and Investigators OA. Efficacy and safety of alirocumab vs ezetimibe in statin-intolerant patients, with a statin rechallenge arm: The ODYSSEY ALTERNATIVE randomized trial. *J Clin Lipidol.* 2015;9:758-69.
13. Roth EM, Moriarty PM, Bergeron J, Langslet G, Manvelian G, Zhao J, Baccara-Dinet MT and Rader DJ. A phase III randomized trial evaluating alirocumab 300 mg every 4 weeks as monotherapy or add-on to statin: ODYSSEY CHOICE I. *Atherosclerosis.* 2016;254:254-262.
14. Stoes E, Guyton JR, Lepor N, Civeira F, Gaudet D, Watts GF, Baccara-Dinet MT, Lecorps G, Manvelian G and Farnier M. Efficacy and Safety of Alirocumab 150 mg Every 4 Weeks in Patients With Hypercholesterolemia Not on Statin Therapy: The ODYSSEY CHOICE II Study. *J Am Heart Assoc.* 2016;5.
15. Kereiakes DJ, Robinson JG, Cannon CP, Lorenzato C, Pordy R, Chaudhari U and Colhoun HM. Efficacy and safety of the proprotein convertase subtilisin/kexin type 9 inhibitor alirocumab among high cardiovascular risk patients on maximally tolerated statin therapy: The ODYSSEY COMBO I study. *Am Heart J.* 2015;169:906-915.e13.
16. Cannon CP, Cariou B, Blom D, McKenney JM, Lorenzato C, Pordy R, Chaudhari U, Colhoun HM and Investigators OCI. Efficacy and safety of alirocumab in high cardiovascular risk patients with inadequately controlled hypercholesterolaemia on maximally tolerated doses of statins: the ODYSSEY COMBO II randomized controlled trial. *Eur Heart J.* 2015;36:1186-94.
17. Moriarty PM, Parhofer KG, Babirak SP, Cornier MA, Duell PB, Hohenstein B, Leebmann J, Ramlow W, Schettler V, Simha V, Steinhagen-Thiessen E, Thompson PD, Vogt A, von Stritzky B, Du Y and Manvelian G. Alirocumab in patients with heterozygous familial hypercholesterolaemia undergoing lipoprotein apheresis: the ODYSSEY ESCAPE trial. *Eur Heart J.* 2016;37:3588-3595.

18. Kastelein JJ, Ginsberg HN, Langslet G, Hovingh GK, Ceska R, Dufour R, Blom D, Civeira F, Krempf M, Lorenzato C, Zhao J, Pordy R, Baccara-Dinet MT, Gipe DA, Geiger MJ and Farnier M. ODYSSEY FH I and FH II: 78 week results with alirocumab treatment in 735 patients with heterozygous familial hypercholesterolaemia. *Eur Heart J*. 2015;36:2996-3003.
19. Ginsberg HN, Rader DJ, Raal FJ, Guyton JR, Baccara-Dinet MT, Lorenzato C, Pordy R and Stroes E. Efficacy and Safety of Alirocumab in Patients with Heterozygous Familial Hypercholesterolemia and LDL-C of 160 mg/dl or Higher. *Cardiovasc Drugs Ther*. 2016;30:473-483.
20. Teramoto T, Kobayashi M, Tasaki H, Yagyu H, Higashikata T, Takagi Y, Uno K, Baccara-Dinet MT and Nohara A. Efficacy and Safety of Alirocumab in Japanese Patients With Heterozygous Familial Hypercholesterolemia or at High Cardiovascular Risk With Hypercholesterolemia Not Adequately Controlled With Statins- ODYSSEY JAPAN Randomized Controlled Trial. *Circ J*. 2016;80:1980-7.
21. Robinson JG, Farnier M, Krempf M, Bergeron J, Luc G, Averna M, Stroes ES, Langslet G, Raal FJ, El Shahawy M, Koren MJ, Lepor NE, Lorenzato C, Pordy R, Chaudhari U, Kastelein JJ and Investigators OLT. Efficacy and safety of alirocumab in reducing lipids and cardiovascular events. *N Engl J Med*. 2015;372:1489-99.
22. Roth EM, Taskinen MR, Ginsberg HN, Kastelein JJ, Colhoun HM, Robinson JG, Merlet L, Pordy R and Baccara-Dinet MT. Monotherapy with the PCSK9 inhibitor alirocumab versus ezetimibe in patients with hypercholesterolemia: results of a 24 week, double-blind, randomized Phase 3 trial. *Int J Cardiol*. 2014;176:55-61.
23. Bays H, Gaudet D, Weiss R, Ruiz JL, Watts GF, Gouni-Berthold I, Robinson J, Zhao J, Hanotin C and Donahue S. Alirocumab as Add-On to Atorvastatin Versus Other Lipid Treatment Strategies: ODYSSEY OPTIONS I Randomized Trial. *J Clin Endocrinol Metab*. 2015;100:3140-8.



24. Farnier M, Jones P, Severance R, Averna M, Steinhagen-Thiessen E, Colhoun HM, Du Y, Hanotin C and Donahue S. Efficacy and safety of adding alirocumab to rosuvastatin versus adding ezetimibe or doubling the rosuvastatin dose in high cardiovascular-risk patients: The ODYSSEY OPTIONS II randomized trial. *Atherosclerosis*. 2016;244:138-46.
25. Sabatine MS, Giugliano RP, Wiviott SD, Raal FJ, Blom DJ, Robinson J, Ballantyne CM, Somaratne R, Legg J, Wasserman SM, Scott R, Koren MJ, Stein EA and Open-Label Study of Long-Term Evaluation against LDL-C. Efficacy and safety of evolocumab in reducing lipids and cardiovascular events. *N Engl J Med*. 2015;372:1500-9.
26. Roth EM, McKenney JM, Hanotin C, Asset G and Stein EA. Atorvastatin with or without an antibody to PCSK9 in primary hypercholesterolemia. *N Engl J Med*. 2012;367:1891-900.
27. Raal F, Scott R, Somaratne R, Bridges I, Li G, Wasserman SM and Stein EA. Low-density lipoprotein cholesterol-lowering effects of AMG 145, a monoclonal antibody to proprotein convertase subtilisin/kexin type 9 serine protease in patients with heterozygous familial hypercholesterolemia: the Reduction of LDL-C with PCSK9 Inhibition in Heterozygous Familial Hypercholesterolemia Disorder (RUTHERFORD) randomized trial. *Circulation*. 2012;126:2408-17.
28. Raal FJ, Stein EA, Dufour R, Turner T, Civeira F, Burgess L, Langslet G, Scott R, Olsson AG, Sullivan D, Hovingh GK, Cariou B, Gouni-Berthold I, Somaratne R, Bridges I, Scott R, Wasserman SM, Gaudet D and Investigators R-. PCSK9 inhibition with evolocumab (AMG 145) in heterozygous familial hypercholesterolaemia (RUTHERFORD-2): a randomised, double-blind, placebo-controlled trial. *Lancet*. 2015;385:331-40.
29. Stein EA, Gipe D, Bergeron J, Gaudet D, Weiss R, Dufour R, Wu R and Pordy R. Effect of a monoclonal antibody to PCSK9, REGN727/SAR236553, to reduce low-density lipoprotein cholesterol in patients with heterozygous familial hypercholesterolaemia on stable statin dose with or without ezetimibe therapy: a phase 2 randomised controlled trial. *Lancet*. 2012;380:29-36.

30. Teramoto T, Kobayashi M, Uno K, Takagi Y, Matsuoka O, Sugimoto M, Inoue S, Minami F and Baccara-Dinet MT. Efficacy and Safety of Alirocumab in Japanese Subjects (Phase 1 and 2 Studies). *Am J Cardiol.* 2016;118:56-63.
31. Raal FJ, Honarpour N, Blom DJ, Hovingh GK, Xu F, Scott R, Wasserman SM, Stein EA and Investigators T. Inhibition of PCSK9 with evolocumab in homozygous familial hypercholesterolaemia (TESLA Part B): a randomised, double-blind, placebo-controlled trial. *Lancet.* 2015;385:341-50.
32. Hirayama A, Honarpour N, Yoshida M, Yamashita S, Huang F, Wasserman SM and Teramoto T. Effects of evolocumab (AMG 145), a monoclonal antibody to PCSK9, in hypercholesterolemic, statin-treated Japanese patients at high cardiovascular risk--primary results from the phase 2 YUKAWA study. *Circ J.* 2014;78:1073-82.
33. Kiyosue A, Honarpour N, Kurtz C, Xue A, Wasserman SM and Hirayama A. A Phase 3 Study of Evolocumab (AMG 145) in Statin-Treated Japanese Patients at High Cardiovascular Risk. *Am J Cardiol.* 2016;117:40-7.
